# Supplementary material for: Detailed experimental investigation of the aerodynamics and blade/tower interaction of a 1.5 MW wind turbine in a downwind configuration
Source: Copernicus journal article supplement (doi:10.5194/wes-2025-204), 2025-10-17
Supplement: Supplementary file [file wes-2025-204-RC2-supplement.pdf]

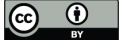

## Detailed experimental investigation of the aerodynamics and blade/tower interaction of a 1.5 MW wind turbine in a downwind configuration

Helge Aagaard Madsen<sup>1</sup>, Pietro Bortolotti<sup>2</sup>, Thanasis Barlas<sup>1</sup>, Pourya Nikoueeayan<sup>3</sup>, Christopher Kelley<sup>4</sup>, Claus Brian Munk Pedersen<sup>1</sup>, Per Hansen<sup>1</sup>, Andreas Fischer<sup>1</sup>, Chris Ivanov<sup>2</sup>, Jason Roadman<sup>2</sup>, Jonathan Naughton<sup>3,5</sup>, Kenneth Brown<sup>4</sup>, Mark Iverson<sup>2</sup>, and Simon Thao<sup>2</sup>

<sup>1</sup>Technical University of Denmark, Department of Wind and Energy Systems, DK 4000 Roskilde, Denmark

<sup>2</sup>National Renewable Energy Laboratory, 15013 Denver West Parkway, Golden, CO 80401, USA.

<sup>3</sup>Resono Pressure Systems, 1938 Harney St, Laramie, WY 82072, USA.

<sup>4</sup>Sandia National Laboratories, P.O. Box 5800, Albuquerque, NM, 87185, USA.

<sup>5</sup>University of Wyoming, 1000 E. University Ave, Laramie, WY 82071, USA.

**Correspondence:** Helge Aagaard Madsen (hama@dtu.dk)

**Abstract.** We present a detailed experimental investigation of the flow details of the blade/tower interaction on a 1.5 MW wind turbine operated in a downwind configuration. The study aims to address claims of shortcomings in the downwind turbine concept, such as impulsive blade loading and the generation of low-frequency noise. The measurement campaign was part of a comprehensive project conducted by the National Renewable Energy Laboratory and its partners exploring the feasibility, reliability, and performance of wind turbines whose rotors are oriented downwind instead of the more traditional upwind configuration. The campaign measured blade pressure distributions at two radial positions on one blade and pressure on the tower surface at the position corresponding to the blade path of the outboard instrumented section on the blade. Pressure distributions on the blade and tower were measured using add-on pressure belts, and local inflow was measured on the blade with two five-hole probes. Despite challenging weather conditions, two measurement campaigns of different durations were successfully completed. The analysis of the datasets indicates the data are of good quality and highlights the importance of dynamically reconstructing the tower pressure measurements that used pressure belts up to 10.7 m in length. Impulse loading is found to be 100–150 N m<sup>-1</sup> on the tower and 200–500 N m<sup>-1</sup> on the blade in a time span of approximately 0.3 s. The detailed pressure measurements make the dataset well suited for use in validating high-fidelity models such as full three-dimensional computational fluid dynamics rotor simulations that include tower flow.

# Summary of Comments on wes-2025-204\_R2.pdf

---

Page: 1

---

 Number: 1      Author: RR      Subject: Highlight      Date: 08/04/2026 17:47:08

---

Neither the abstract nor the paper include findings regarding these shortcomings. The paper reads more like the presentation of a validation data set. If the authors can reach conclusions on the pros/cons of the downwind configuration they should do so in the conclusions (and add it to the abstract). If not, then perhaps the abstract should avoid mentioning addressing the shortcomings.

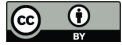

## 1 Introduction

The upwind turbine concept, in which three-bladed wind turbines are positioned with the rotor upwind of the tower, is by far the dominant industrial wind turbine configuration. This configuration has been used throughout modern wind turbine development, except in the late 1970s and early 1980s when downwind megawatt-scale prototype turbines were designed and tested in the United States and Sweden, among other places. Low-frequency noise was experienced with the MOD-1 2 MW turbine (Kelley, 1981) and other downwind turbines in the United States (Hubbard and Shepherd, 1991) as well as with the 3 MW Maglarp turbine in Sweden. Noise generation was linked to the blades passing through the wake behind the tower. The Maglarp turbine had a tubular tower, whereas the MOD-1 turbine had a lattice tower with four main poles. In addition to the low-frequency noise problem, impulsive loading of the blades during tower passage also increased fatigue loads.

These early negative experiences with downwind turbines led to the dominance of the upwind rotor concept from the late 1980s onward. However, in the last two decades there has been a renewed interest in downwind turbines because their relative advantages over upwind turbines might increase with upscaling. In a numerical study (Bortolotti et al., 2019) comparing upwind and downwind 10 MW rotors, it was shown that the downwind rotor concept has a slightly lower cost of energy thanks to lighter blades, whose more flexible design is enabled by the relaxed constraint on blade/tower clearance. A further advantage of downwind turbines is the direction of tilt, which can have a positive impact on the power capture for hilly sites characterized by upflow conditions as well as for floating turbines (Bortolotti et al., 2019). In addition, the more flexible rotor enabled by downwind turbines can be an advantage when transporting blades by rail (Bortolotti et al., 2021).

However, potential fundamental drawbacks, like the increased low-frequency noise and impulsive loading experienced by early downwind prototypes, have only been sporadically investigated and remain unresolved. An exception is an interesting advancement in low-frequency noise modeling and simulation in which pressure fluctuations on the tower from the blade/tower interaction also seem to contribute considerably to the total low-frequency noise level (Klein et al., 2018; Zajamsek et al., 2019). In previous simulations of low-frequency noise (Viterna, 1982; Madsen et al., 2007; Madsen, 2010) only impulsive blade loading was considered as the source of the noise.

Thus, detailed investigations of these fundamental drawbacks of downwind turbines are still needed. In 2024, a comprehensive experiment was conducted at the National Renewable Energy Laboratory (NREL) to investigate the feasibility, reliability, performance, and economic viability of wind turbines oriented downwind. In the experiment, a 1.5 MW wind turbine located at the NREL Flatirons Campus was operated in a downwind configuration. Loads, power, and acoustic emissions were monitored and compared with the upwind operation of the wind turbine. The motivation, preparation, risk mitigation, execution, and results of the full-scale downwind experiment at NREL are discussed in Bortolotti et al. (2025).

In addition to the power, loads, and acoustic measurements carried out in this experiment (Bortolotti et al., 2025), detailed measurements of the aerodynamics of the rotor and the blade/tower interaction were carried out over a shorter period within the same campaign. A novel instrumentation setup was used to measure the unsteady blade and tower surface pressure with pressure belts and to measure inflow measurements at two blade sections. Typically, aerodynamic and aeroelastic models are validated by integrated measured quantities such as loads and power derived from signals recorded by conventional instru-

This page contains no comments



50 mentation like strain gauges and accelerometers. The predictions of aerodynamic and aeroelastic codes can be satisfactorily validated in this way (Brown et al., 2024). In this case, however, the exploration of some fundamental properties of the aerodynamics of a downwind rotor and the blade/tower interaction require more detailed measurements for model validation.

The main objective of this paper is to describe the instrumentation for the detailed aerodynamic measurements with pressure belts, the deployment of the equipment, and some initial results. The organization of the paper is as follows. The turbine is presented in Sect. 2, followed by a description of the experimental setup and the deployment in Sect. 3. An overview of the measured data and some initial results from the postprocessing are presented in Sect. 4. Finally, a discussion and outlook are provided in Sect. 5 and conclusions are given in Sect. 6.

## 2 Turbine

The turbine adopted in this study is a 1.5 MW GE SLE machine manufactured by GE Vernova and installed at NREL's Flatirons Campus. The turbine has a rotor diameter of 77 m, hub height of 80 m, and nameplate capacity of 1.5 MW. More details about the turbine can be found in Bortolotti et al. (2025) and in older technical reports released by NREL, namely, Santos and van Dam (2015) and Mendoza et al. (2015). The turbine is highly instrumented with sensors that monitor loads and performance. Note that during the deployment of the pressure belts, an array of four microphones was also deployed in the field to record acoustic emissions in the low-frequency and audible ranges (Bortolotti et al., 2025).

### 65 2.1 Downwind rotor

**1**As mentioned above, the deployment of the pressure belts represents an element of a larger experiment focused on the characterization of the loads and acoustic emissions of downwind rotors. The experiment consisted of flipping the rotor of the 1.5 MW wind turbine from upwind to downwind. **2**This was achieved by pitching the blades 180 degrees and yawing the nacelle 180 degrees. To an observer located upwind of the turbine, the rotor continued to spin clockwise and the pitch rate of the three blades was in the same direction. However, in the downwind configuration, the blades flew behind the tower and experienced a strong wake deficit induced by the presence of the tower. The experiment was motivated by the need to quantify the increase in fatigue loads and acoustic emissions of the downwind rotors compared to the upwind rotors, since the downwind rotor configuration is proposed for very large and very flexible wind turbines. (Bortolotti et al., 2025). The downwind orientation of the rotor represents an additional challenge for the pressure belts, which were used to characterize the effect of higher-frequency step changes in loading during blade passage. Many of the findings discussed in this work also apply to conventional wind turbines with upwind rotors.

### 2.2 Aeroelasticity

The aeroelastic model of the turbine is available in NREL's aero-servo-elastic solver OpenFAST. The simulations presented in this study were run with OpenFAST v3.3.0 (OpenFAST, 2022), which was coupled to the industrial controller provided by GE Vernova in the form of a compiled dynamic link library. Both polars – in the form of lift, drag, and moment coefficients – and

---

 Number: 1 Author: RR Subject: Highlight Date: 08/04/2026 17:47:08  
The readers already know this, so this is probably redundant

---

 Number: 2 Author: RR Subject: Highlight Date: 08/04/2026 17:47:08  
Can the authors comment on whether and in what way would the findings of this study be affected if a turbine designed to operate in a downwind config was used?

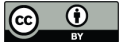

coordinates of the airfoils adopted along the span of the blades are known. The aeroelastic model uses a simple Euler–Bernoulli beam formulation for blades and towers and lifting lines for blades that include the effects of unsteady airfoil aerodynamics. Unsteady airfoil aerodynamics are implemented with  $\mathbb{1}$ AMod = 3, which is a modification to the original Beddoes–Leishman formulation (Damiani and Hayman, 2019). The tower wake is modeled with a standard Powles shadow model (Powles, 1983),  
85 which is implemented in OpenFAST as described in Moriarty and Hansen (2005).

### 2.3 Airfoil performance

The coordinates of the airfoils were fed to the Ellipsys2D two-dimensional (2D) fluid dynamics solver (Sørensen, 1995), which generated lift and drag coefficients as a function of angle of attack for both clean and fully turbulent conditions. To capture transitional boundary layers, the  $e^N$  transition model is used (van Ingen, 1956; Smith and Gamberoni, 1956; Drela and Giles,  
90 1987; Michelsen, Jess A., 2002). A satisfactory match was found between these predictions and the airfoil coefficients shared by GE Vernova within the aeroelastic model. These predictions were later compared with the experimental measurements (see Sect. 4).

## 3 Instrumentation to characterize rotor aerodynamics and blade/vortex interaction

For the detailed characterization of the aerodynamics of a blade section of the rotor blade and the flow details of the blade/tower  
95 interaction, we use a novel add-on measurement system comprising three pressure belts, two five-hole probes, and three data acquisition systems. The system was developed at the Technical University of Denmark (DTU) over the last 7 years and was recently applied in two full-scale campaigns (Madsen et al., 2022, 2025).

In the configuration for this study, we measured pressure distributions at two radial positions on one blade, each instrumented with a 32-tap pressure belt connected to two mini pressure scanners fixed to the blade surface at the trailing edge. The instru-  
100 mentation included an aerodynamically shaped enclosure (referred to as a flyboard) that contained data acquisition, a WiFi system, batteries, and a five-hole probe (Fig. 1). The experimental setup measured the surface pressure along the belt, and the five-hole probe was used to reconstruct the inflow velocity. During its development, the experimental system was repeatedly tested in the Poul La Cour wind tunnel at DTU and validated against data from a conventional tap installation. The complete system for one blade section can be mounted on a full-scale wind turbine by technicians in a few hours.

105 In the present experiment, an additional pressure belt was installed on the tower to further characterize the blade/tower interaction by measuring the pressure fluctuations on the tower.

### 3.1 Belts

The extruded belt, with cross section shown in Fig. 2, is made of 32 channels, each with a diameter of 0.8 mm. The belt is 100 mm wide and has a maximum thickness of 1.8 mm. A pressure tap hole is drilled into each channel at a specified chord  
110 position, which is chosen to maximize the resolution of the pressure distribution and to minimize the disturbance among the pressure taps. The position of the taps is shown in Sec. 3.2. Each blade belt is connected to two 16-channel miniature pressure

---

 Number: 1      Author: RR      Subject: Highlight      Date: 08/04/2026 17:47:08

The important piece of information here is the Unsteady Aerodynamics model, rather than the parameter value in the solver. Please refrain from providing parameter names (especially if they are not defined).

---

 Number: 2      Author: RR      Subject: Highlight      Date: 08/04/2026 17:47:08

Please provide an accuracy estimate of the system.

---

 Number: 3      Author: RR      Subject: Highlight      Date: 08/04/2026 17:47:08

Perhaps Fig. 4 would be more suitable here.

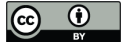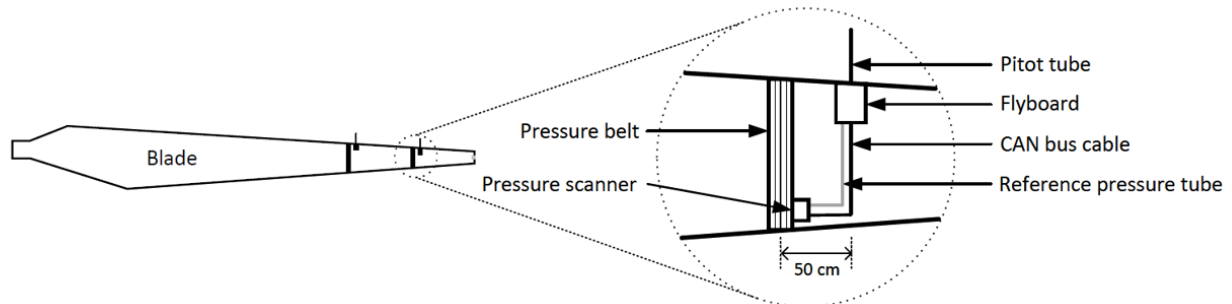

**Figure 1.** Schematic illustration of the inflow and pressure belt instrumentation on the 1.5 MW turbine in a downwind configuration at NREL's Flatirons Campus.

scanners via a printed fixture. The pressure scanners, with a size of 37 x 32.4 x 9.2 mm, are operated in a so-called calculated differential mode, where one of the ports is used as reference. The full-scale range is -400 to 200 mbar with a resolution of 0.03 mbar. The scanners are attached to the blade surface close to the trailing edge and connected with a signal cable to the data acquisition system in the flyboard. Further details of the instrumentation can be found in Madsen et al. (2022).

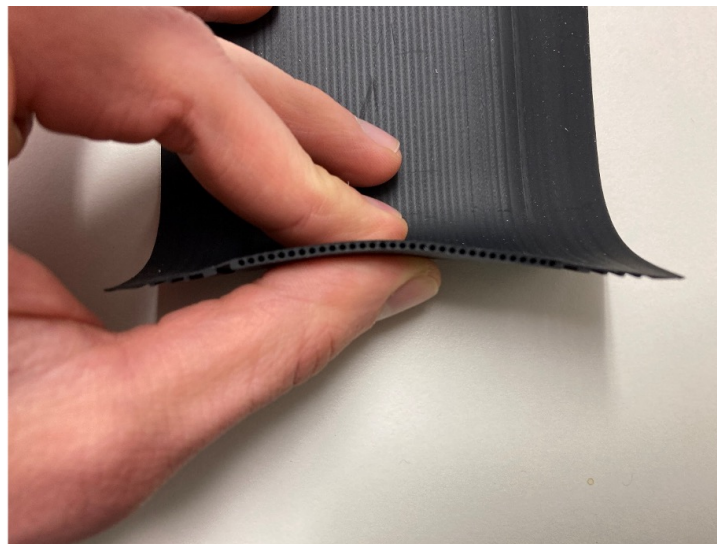

**Figure 2.** Cross section of the extruded pressure belt. Photo credit: Per Hansen, DTU.

The two blade belts were designed to be installed at distances from the blade root of 18.90 m and 31.45 m. The two locations respectively correspond to 3.35 m and 5.80 m from blade tip. The locations, at mid-span and toward the tip of the blade, were chosen to focus on a simpler case where flow is assumed to be close to 2D. Future experiments will be able to focus on more challenging blade regions, such as closer to the root and tip, where flow is known to be more three-dimensional (3D). At the two locations, the chords are known and the airfoils correspond to two master airfoils of known coordinates and performance.

---

 Number: 1 Author: RR Subject: Highlight Date: 08/04/2026 17:47:08

If available, would it be possible to provide a close-up photo from the actual belt installed on the blade? It would help the readers who do not have access to the actual measurement/acquisition system

 Author: RR Subject: Sticky Note Date: 08/04/2026 17:47:08

If not available, you can direct the reader to Fig. 9

---

 Number: 2 Author: RR Subject: Highlight Date: 08/04/2026 17:47:08

for completeness, please provide this in  $r/R$ , too

 Author: RR Subject: Sticky Note Date: 08/04/2026 17:47:08

Also, please provide blade profile chord in  $m$ , and relative thickness at the two locations.

---

 Number: 3 Author: RR Subject: Highlight Date: 08/04/2026 17:47:08

I agree, but it would be nice if the authors could add a reference here.



The length of the belts was set to ensure that the ends of the belts reached the trailing edge on both the suction and pressure sides.

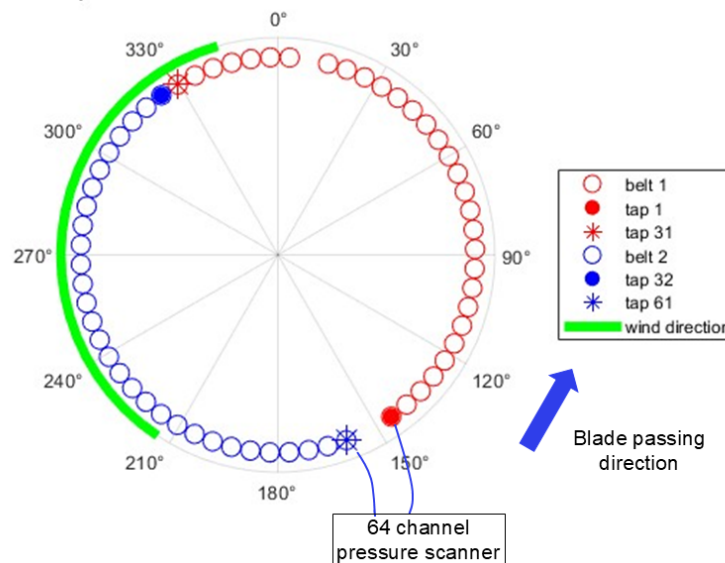

**Figure 3.** Orientation, tap layout, and connection to pressure scanner for the two tower belts.

The belts on the tower were installed at a height of 46.7 m from the base of the tower. The height was chosen because it corresponds to the tower path of the outer belt on the blade in an undeflected turbine configuration. To cover the entire circumference of the tower, two belts were wrapped around the tower, each made of two 32 channel segments of a length of 9.7 m. The two segments were vertically shifted by one belt width (see the photo on the right in Fig. 9) to allow the connection of a 64-channel pressure scanner, which was installed opposite the prevailing wind direction at a location approximately 1 m above the pressure belts. The scanner is the Scannivalve MPS4264 electronic pressure scanning module with a full range of 4 inH<sub>2</sub>O (0.145 Psi). Unlike the belts on the blades, the positions of the taps on the tower were uniformly distributed, except for a few faulty taps not shown, (Fig. 3).

### 3.2 Tap layout of blade pressure belts

The pressure tap (also known as port or orifice) layout used at both belt locations was based on a cosine spacing law. This arrangement produced higher port density at the leading edge and sparser port density at the trailing edge of both pressure and suction surfaces. The spanwise spacing of ports minimized upstream ports tripping the boundary layer for downstream ports, though some degree of disruption of the airfoil boundary layer might be expected in some conditions from the spanwise-running ramps at the edges of the pressure belt (cf. Brown et al. (2018)). The port layout is shown in Fig. 4. The figure shows the relative positions of the pressure ports, and aspect ratio is adjusted for visual clarity.

---

 Number: 1      Author: RR      Subject: Highlight      Date: 08/04/2026 17:47:08

Do you mean the belt was installed on a blade section like a 'C-type' grid (for lack of a better reference)? I think this is what is implied, but it would be nice if the authors could clarify

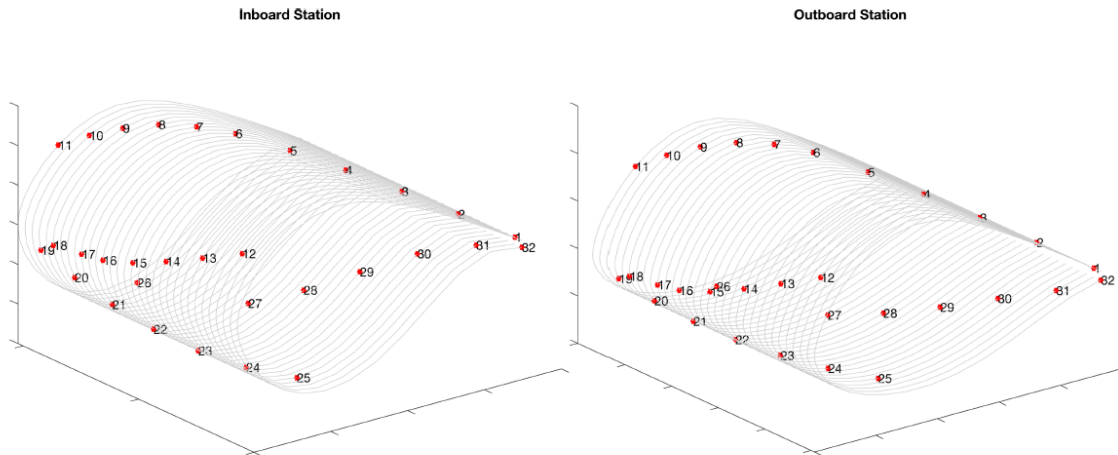

**Figure 4.** Pressure tap layout for inboard station and outboard station showing chord and spanwise positions.

In Fritz et al. (2024) the authors initially developed an optimization routine to minimize the number of pressure ports needed to accurately measure lift coefficient. This work showed that 32 pressure ports with cosine spacing already had a lift coefficient error below 0.01. Therefore, there was not a significant advantage to using an optimized layout. Additionally, pressure belt tubing connectors interfered with optimal port locations near the trailing edge, so a cosine spacing around the airfoil circumference was adopted for this experiment.

### 3.3 Dynamic calibration of the pressure belts

Due to the long blade sections and large tower diameter of the 1.5 MW turbine, the pneumatic pressure belts used in this experiment included extended runs of small-diameter embedded tubing that connected surface taps to miniature pressure scanners. Such configurations are known to introduce dynamic distortions in unsteady pressure measurements, including signal attenuation, resonance amplification, and phase delays. These distortions result from viscous friction and acoustic wave propagation within the tubing and are a function of frequency (Bergh and Tjrdeman, 1965). To ensure accurate pressure signals (both in magnitude and time), which are necessary for analyzing unsteady aerodynamic phenomena such as blade/tower interaction, it was essential to characterize and compensate for each port's dynamic response.

Following the full-scale measurement campaign, the pressure belts were removed from the turbine and transferred to a laboratory environment for post-test characterization of the channel connecting the taps to the transducers. Each pressure channel was individually characterized using an in situ tubing characterization device, which generated a rapid pressure pulse at the belt inlet (e.g., the surface pressure). The resulting pressure response at the scanner end of the tubing (e.g., the remote-raw pressure) was recorded simultaneously with the surface pressure, thereby enabling quantification of the system's frequency-domain transfer function. The tubing system geometry was then modeled, and theoretical transfer functions (e.g., the system response) were generated and compared with experimental data to accurately capture variations in the as-built geometry (Mears

---

 Number: 1 Author: RR Subject: Highlight Date: 08/04/2026 17:47:08  
Axes have no values, units or titles.

---

 Number: 2 Author: RR Subject: Highlight Date: 08/04/2026 17:47:08  
I am assuming (but could be wrong) that the tubing on the blade was under some tension. When brought back to the lab, was this taken into account during the dynamic calibration? Or is the effect not important?

Any other parameters that should be clarified regarding the in situ and lab set ups?



et al., 2024). In practice, reconstruction of the surface pressure requires an inverse process; the remote-raw pressure is used to estimate the surface pressure. A Wiener-filtered inverse model of the system response was developed based on the as-built tubing system geometry and compared with each port's measured reference data, following the methodology of Nikoueeyan and Naughton (2024). The filtering is necessary to avoid amplifying noise present in the remote-raw pressure when reconstructing the surface pressure. These models facilitated the derivation of optimal reconstruction filters capable of suppressing noise amplification while accurately restoring phase and amplitude across the relevant frequency range. Figure 5 presents an example of the dynamic characterization of one representative pressure port. The left panel shows the recorded pressure signals in the time domain, clearly illustrating the distortions induced by the tubing system. The surface pressure exhibits a sharp, high-frequency pressure pulse, whereas the remote-raw pressure is significantly delayed and attenuated, showing resonant behavior (overshoot) caused by acoustic and frictional effects within the tubing. The Wiener-filtered reconstruction produces the remote-reconstructed pressure that demonstrates a significantly improved comparison to the surface reference input, effectively correcting both amplitude attenuation and phase delay. The frequency-domain plot (right panel) confirms these observations, highlighting that the reconstruction accurately restores the broadband frequency content, particularly in the critical frequency range up to several hundred hertz, essential for resolving unsteady aerodynamic phenomena relevant to blade/tower interactions.

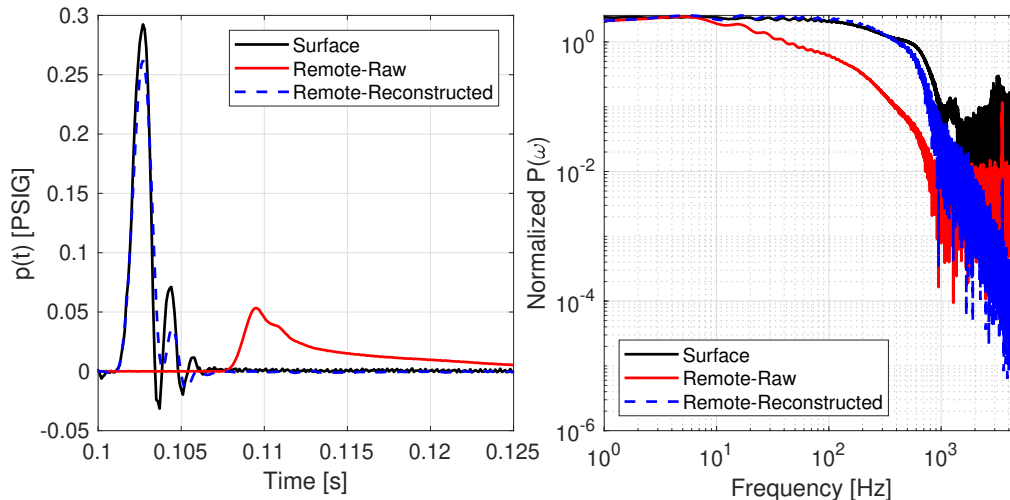

**Figure 5.** Dynamic calibration of the pressure channels. (left) Response of one of the pressure channels to a pressure pulse applied at the surface. Both the raw measured signal at the scanner and the reconstructed pressure are shown. (right) The same three signals in the frequency domain.

It is important to note that the tubing characterization step was conducted at a significantly higher sampling frequency than that used during field testing to ensure increased fidelity of the modeling approach. However, the actual field measurements were acquired at a sampling frequency limited to 100 Hz; consequently, the maximum reconstruction frequency of the test data will be constrained by this sampling frequency bandwidth.

---

 Number: 1 Author: RR Subject: Highlight Date: 08/04/2026 17:47:08  
consider starting a new paragraph here, to facilitate understanding.

---

 Number: 2 Author: RR Subject: Highlight Date: 08/04/2026 17:47:08  
400?



The reconstructed pressure signals were compared against the known input signals from the calibration procedure in both time and frequency domains. For each port, the reconstruction was evaluated based on its ability to recover the sharp pressure rise and broadband content of the calibration impulse. Overall, the reconstruction technique demonstrated effective recovery of high-frequency pressure content up to approximately 20 Hz across many channels, which is critical for resolving unsteady aerodynamic features in the current field test campaign.

The validated reconstruction models were then applied to the raw pressure data acquired during the two downwind test campaigns. The reconstruction was performed as a postprocessing step, channel by channel, using the individualized Wiener-filtered system response model developed for each port. The corrected pressure signals provide a better representation of the unsteady surface pressures on the blade and tower, with significantly reduced influence from tubing-induced distortions through the reconstruction process. These reconstructed datasets form the basis for the aerodynamic analysis and comparisons with numerical predictions discussed in subsequent sections.

### 3.4 Flyboard, data acquisition, and five-hole probe

The flyboards, one adjacent to each belt on the blade, consist of a metal frame with a plastic cover that aims to minimize impact on the surrounding airflow. They contain the data acquisition unit, WiFi, and batteries (see the middle photo in Fig. 9). Each flyboard also carries the five-hole probe, which has a length of 0.42 m. The data acquisition system samples the data from the pressure scanners on the blade, the five-hole probe, and a three-axis accelerometer in the flyboard at a rate of 100 Hz; the data are GPS time-stamped. The WiFi antenna transmits data in real time to the ground for visualization and postprocessing. Note that if the WiFi malfunctions, the data are also stored in the data acquisition system housed in the flyboard and can be retrieved by accessing the flyboard. To maximize battery charge, the data acquisition and WiFi system has a start/stop function that can be controlled remotely, so the system is only operating when measurements are ongoing.

A third data acquisition system is installed at the bottom of the tower and samples the 64 channels from the pressure scanner connected to the pressure belts on the tower at 100 Hz. In postprocessing the data are aligned with the blade pressure data based on the GPS time stamp.

### 3.5 Calibration of the five-hole probes and data processing

The five-hole probes, manufactured by Aeroprobe Inc., have a diameter of 6.35 mm and a spherical head. The pressure ports and the probe coordinate system are shown in Fig. 6. The five-hole probe was calibrated in the red wind tunnel at DTU, (Ildvedsen, 2017). The red wind tunnel provides a maximum flow velocity of  $40 \text{ m s}^{-1}$  and a turbulence intensity of less than 0.1%. The test section is 2000 mm long and has a cross section of 750 mm x 500 mm. the tip of the five-hole probe was placed on a turn table 750 mm downstream of the inlet (Fig. 7). A reference Pitot tube was placed 60 mm downstream of the inlet.

---

 Number: 1 Author: RR Subject: Highlight Date: 08/04/2026 17:47:08  
what were the dimensions of the flyboard?

---

 Number: 2 Author: RR Subject: Highlight Date: 08/04/2026 17:47:08  
perhaps add the word physically here

---

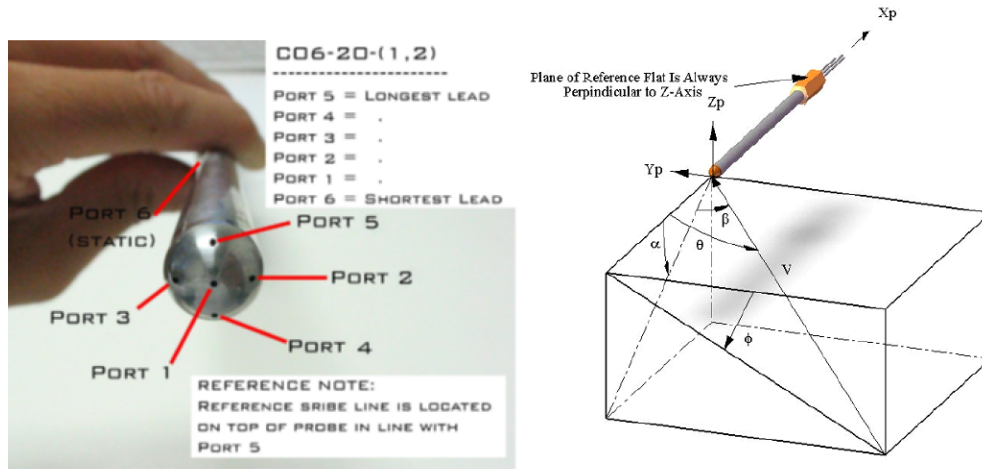

**Figure 6.** (left) A photo of the pressure ports of the five-hole probe from the aeroprobe manual. (right) The probe coordinate system.

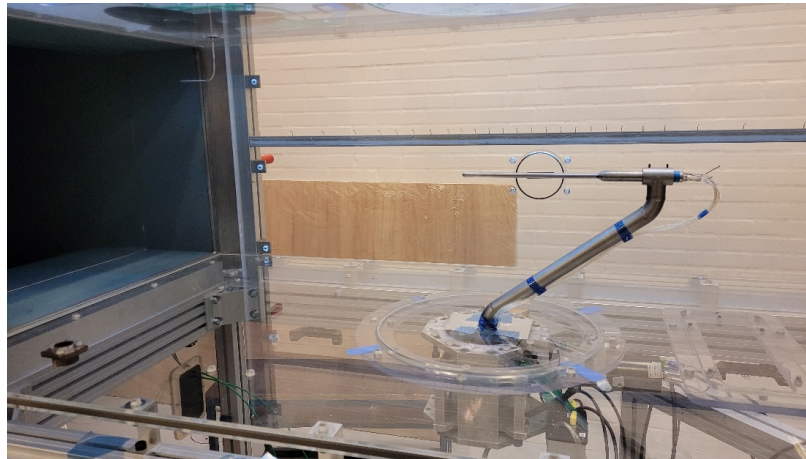

**Figure 7.** The calibration setup for the five-hole probe.

The calibration was performed at two flow speeds,  $20 \text{ m s}^{-1}$  and  $40 \text{ m s}^{-1}$ . Five differential pressures were measured during calibration

$$\Delta p_{16} = p_1 - p_6 \tag{1}$$

$$\Delta p_{23} = p_2 - p_3 \tag{2}$$

$$210 \quad \Delta p_{45} = p_4 - p_5 \tag{3}$$

$$\Delta p_{t6} = p_t - p_6 \tag{4}$$

$$\Delta p_{s6} = p_s - p_6 \tag{5}$$

This page contains no comments

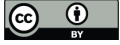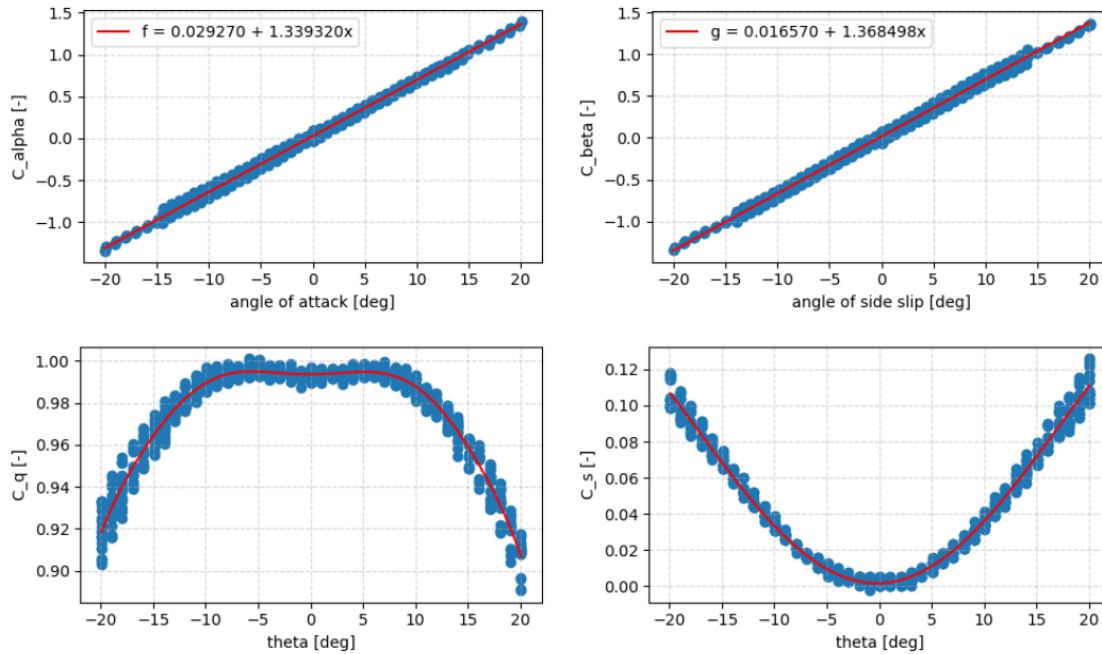

**Figure 8.** The calibration coefficients of the five-hole probe. The calibration parameters are shown as a function of the most important parameter at various side slip angles.

where  $p_n$  is the pressure at port  $n = 1 \dots 6$ ,  $p_t$  is the total pressure from the reference Pitot tube, and  $p_s$  is the static pressure from the reference Pitot tube. The reference dynamic pressure is calculated by

$$215 \quad q = \Delta p_{t6} - \Delta p_{s6}. \quad (6)$$

The four coefficients

$$C_\alpha = \frac{\Delta p_{45}}{\Delta p_{16}} \quad (7)$$

$$C_\beta = \frac{\Delta p_{23}}{\Delta p_{16}} \quad (8)$$

$$C_q = \frac{\Delta p_{16}}{q} \quad (9)$$

$$220 \quad C_s = \frac{\Delta p_{s6}}{q} \quad (10)$$

are calculated by using the calibration pressures from the reference Pitot tube. The results for a flow speed of  $20 \text{ m s}^{-1}$  are displayed in Fig. 8. The results of the calibration at a flow speed of  $40 \text{ m s}^{-1}$  are not displayed, because the result is very similar to the result at  $20 \text{ m s}^{-1}$ . In addition, it was found that each calibration coefficient depended mainly on one flow angle

This page contains no comments



and the influence of the other flow angle could be neglected. Hence, the approximations

225  $C_\alpha = f(\alpha)$  (11)

$$C_\beta = g(\beta) \quad (12)$$

$$C_q = h(\theta) \quad (13)$$

$$C_s = k(\theta) \quad (14)$$

were made. The calibration coefficients do not depend on flow speed. This approximation holds if the flow Mach number is  
230 lower than 0.3. The calibration functions were assumed to have polynomial shapes and were displayed in red in Fig. 8.

The data reduction using the calibration coefficients was done in the following way:

- $C_\alpha$  and  $C_\beta$  were computed with the measured five-hole probe pressure differentials.
- The functions  $f$  and  $g$  were inverted to get  $\alpha$  and  $\beta$ .
- $\theta$  was computed from  $\alpha$  and  $\beta$ .
- 235 –  $C_q$  and  $C_s$  were computed from  $\theta$  with  $h$  and  $k$ .
- The dynamic pressure was computed as  $q = C_q \Delta p_{16}$ .
- The pressure coefficients at the belt ports were computed as  $c_{p,b} = \frac{p_b - p_6}{q} - C_s$ , where  $p_b$  are the pressures at the ports of the belt.

### 3.6 Deployment

240 The deployment of the measurement system, which was planned for the last two weeks in April 2024, was challenged by rainy, windy, and cold weather. On Sunday, 21 April, the weather was dry and sunny, but the low temperature in the morning required the removal of ice from the top of the nacelle, the hub, and the blade surface in the area for the belt before the installation could start. Despite nonoptimal installation conditions, both pressure belt systems on blade 1 were installed on this day from a lift (left and middle photos in Fig. 9). The already installed inner belt and flyboard are visible at the mid-span of blade 1.

245 The middle photo of Fig. 9 shows the belt and the flyboard installed at the outer blade span location. The belt is toward the blade root, and the flyboard is toward the blade tip. The installation included the correct positioning of the two five-hole probes, which were aligned with the mean angle of attack at the two spanwise stations. Angles of attack for alignment of the five-hole probes were estimated by running the turbine model in OpenFAST through six turbulent seeds from the normal turbulence model with an average wind speed at the hub height between 5 and 11 m s<sup>-1</sup> in steps of 1 m s<sup>-1</sup>.

250 The installation of the measurement system without the tower belt was completed in the morning of the following day. Instead of taking time to mount the tower belt, a measurement campaign of several hours was conducted that day.

Unfortunately, rainy weather followed the next several days, until Monday, 29 April, when it was possible to install the tower belt. The right photo of Fig. 9 shows the installed pressure belt with the vertical displacement of the belts relative to each other. A short measurement campaign was conducted in the afternoon that day with all three pressure belts working.

This page contains no comments

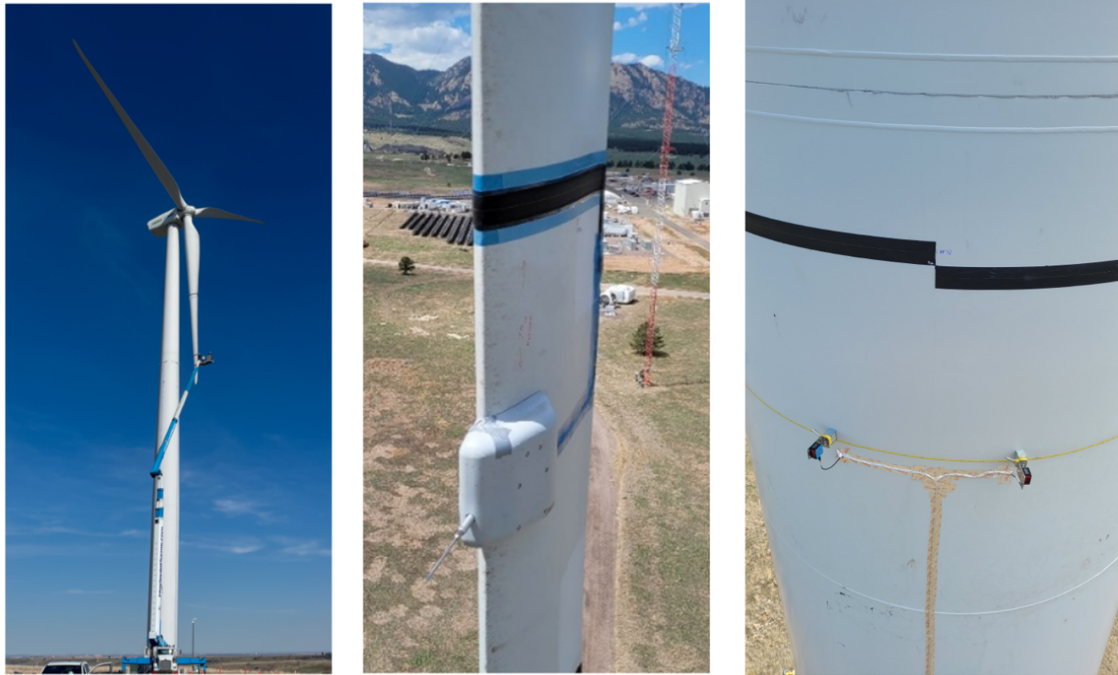

**Figure 9.** (left) Installation of the outer belt on blade 1 of the GE 1.5 MW wind turbine. The rotor is parked in a downwind configuration. The inner belt and flyboard are visible at the mid-span of blade 1. The belt on the tower had not yet been installed when this photo was taken. Photo credit: Pietro Bortolotti, NREL. (middle) Close-up view of the flyboard, five-hole probe, and belt installed at the outer blade location. Photo credit: Per Hansen, DTU. (right) The belts on the tower, each covering half of the circumference, were installed 1 m above the laser sensors and at the height of the outer belt on blade 1. Photo credit: Per Hansen, DTU.

## 255 4 Results

### 4.1 Overview of collected data

~~As mentioned above,~~ data were collected on two days: 22 April (D1) and 29 April (D2) 2024. During D1, only the two blade systems were available. During D2, all systems were available, but data on the inner station of the blade were partly corrupted by the presence of water in the inner blade belt.

#### 260 4.1.1 Campaign 1 on 22 April 2024

An overview of wind conditions during the D1 campaign is shown in Fig. 10, and the corresponding selected sensors for the turbine operation are shown in Fig. 11. As shown by the measured wind speeds at three heights in Fig. 10 (left), the wind varied a lot during the first 2–3 hours of the measurement campaign. Later in the afternoon, the wind speed was more stable. The large variations in wind speed had a positive impact: During this short campaign of about 5 hours, the turbine operated from cut-in

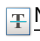

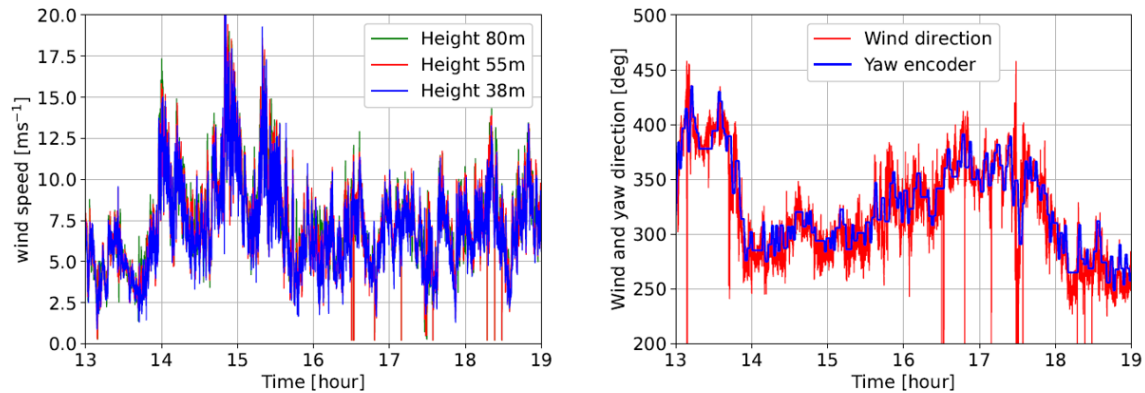

**Figure 10.** (left) Wind speed at three different heights during the D1 measurement campaign. (right) Wind direction at 38 m height in the meteorology mast compared to the yaw encoder sensor.

265 wind speed to rated power with pitch regulation, as observed in the lower-left graph in Fig. 11 and in the rotor speed variations in the top-right graph in Fig. 11. The drawback is the large variations in wind direction that result in high instantaneous yaw errors, as shown in the bottom-right graph in Fig. 11, which limits useful data when a narrow filter on the yaw error is applied. The impact of applying a 60 s moving average reduces the variations in the yaw error considerably.

#### 4.1.2 Campaign 2 on 29 April 2024

270 On the morning of 29 April, the measurement system was prepared for a new measurement campaign after almost a week of rainy weather. The preparation lasted until around 3 p.m. local time and, as the decommissioning of the system was prepared for late afternoon, only about 1 hour of measurements were possible. However, 1 hour of high-quality data were acquired from the outboard blade pressure belt and the tower belt, which enables the detailed investigation of the blade/tower interaction, thus fulfilling one of the main objectives with the instrumentation. In addition, it demonstrated the importance of accurately  
275 resolving time dependence of the pressure distributions.

An overview of the wind conditions during the D2 campaign is shown in Fig. 12, and the corresponding selected sensors for turbine operation are shown in Fig. 13. In contrast to the wind conditions of D1, the wind speed was much more stable during the afternoon of D2, and the instantaneous changes in the wind direction were also smaller (Fig. 12).

280 During the interval measured on D2, the turbine operated below rated power, as seen in the upper-left graph of Fig. 13, but most of the time it was well above zero power. In addition, the rotor speed varied from the minimum setting to almost maximum speed, making the dataset a good representation for general turbine operation. We also show the yaw error in the lower-right graph of Fig. 13, which is still quite unsteady but has less variability than in the D1 campaign.

Why not the five hours from the previous campaign?

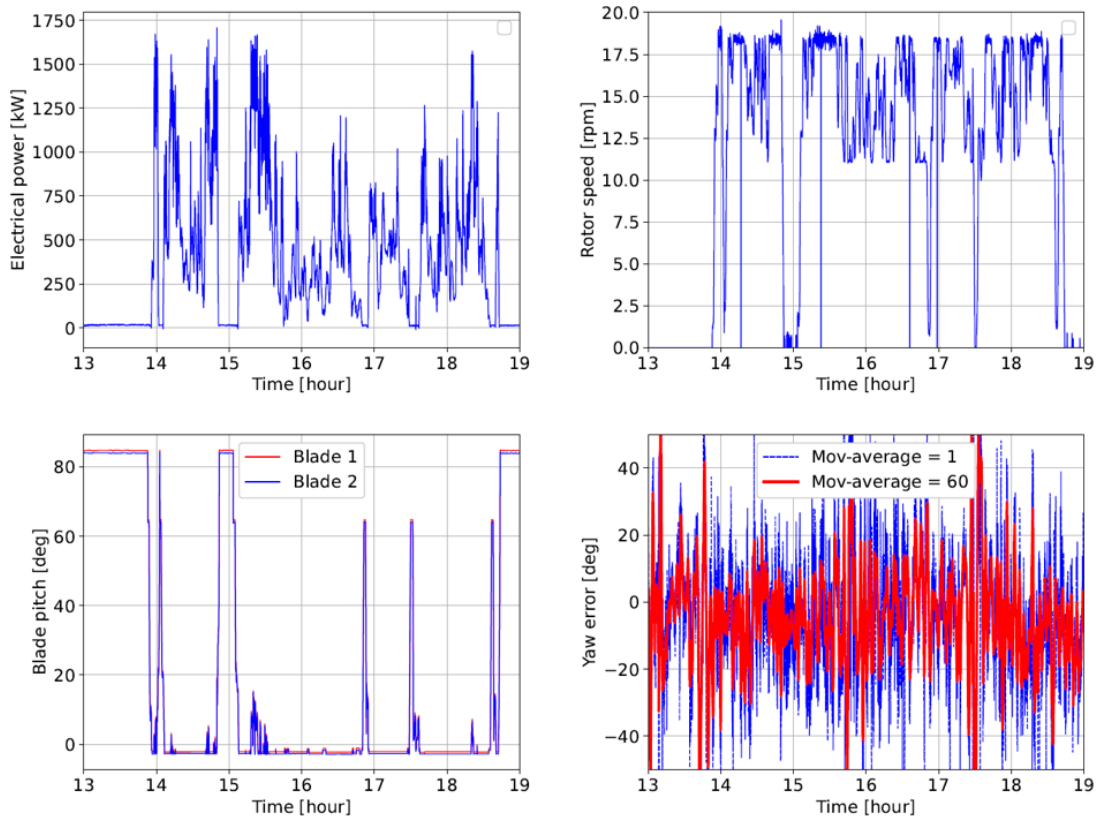

**Figure 11.** (top left) Electrical power and (bottom left) blade pitch for the D1 campaign. (top right) Rotor speed and (bottom right) yaw error with no moving average of the 1 Hz data and comparison with a 60 s averaging.

## 4.2 Data processing

The pressure data were filtered using conditions extracted from the SCADA data to find time periods of fully operational data.

285 The following filters were applied:

- Active power larger than 150 kW
- Blade pitch angle smaller than 15 degrees
- Absolute value of the yaw error smaller than 10 degrees.

The application of these filters reduced the dataset to 1.4 hours for D1 and 0.28 hours for D2.

290 Data from the five-hole probe were first converted to inflow velocity and inflow angle using the calibration obtained during wind tunnel testing. Next, these quantities were used to estimate the angle of attack and relative velocity based on Ellipsys2D computational fluid dynamics (CFD) simulations. The trailing edge pressure measured from the belts was interpolated first, and then the pressures were integrated to determine aerodynamic forces and coefficients. The results were time-averaged (10

This page contains no comments

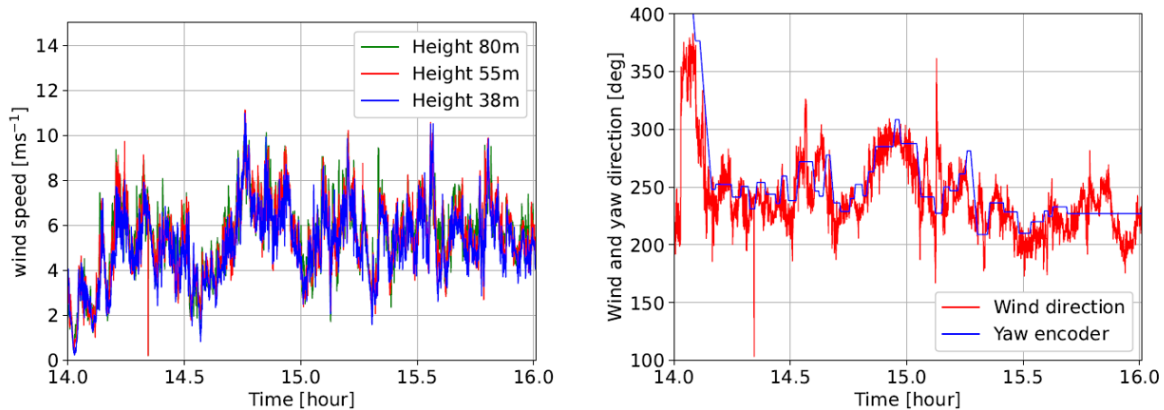

**Figure 12.** (left) Wind speed at three different heights during the D2 measurement campaign. (right) Wind direction from the meteorological mast at 38 m height compared with the output from the yaw encoder sensor.

samples, resolving up to 10 Hz), filtered based on SCADA data, and binned in terms of angle of attack and azimuth. The  
295 pressure coefficient,  $C_p$ , for the measured data was calculated using the static and dynamic pressure from the five-hole probe.

### 4.3 Pressure coefficient

In Fig. 14, the measured  $C_p$  distribution of the inboard section binned on various angles of attack is presented and compared to Ellypsis2D CFD results. There is a clear discrepancy, especially on the suction side, resulting in an overall loading difference with the model results. This could be attributed to shape and roughness imperfections, but is more likely caused by uncertainty  
300 in the conversion of the measured inflow angle by the five-hole probe to angle of attack. This uncertainty in conversion increases inboard because of 3D flow effects not taken into account in the 2D CFD upwash correction applied. Another clear deviation is the missing suction peak at angles of attack of 8 and 10 degrees, as seen in the lower two graphs of Fig. 14.

In Fig. 15, the measured  $C_p$  distribution of the outboard section binned on various angles of attack is presented and compared to Ellypsis2D CFD results. The simulation results show a good match with the measurements, especially the fully turbulent  
305 ones, indicating a good estimation of the overall loading. The improved correlation between measurements and simulations for this station compared with the inboard station mentioned above can probably also be attributed to a more 2D inflow at this station. We also notice here that the suction peak at 8 degrees and, in particular, at 10 degrees is well captured by the pressure measurements.

### 4.4 Lift coefficient

310 In Fig. 16, the measured binned lift coefficients of both sections are compared to the Ellypsis2D CFD data. The measurements for the inboard section indicate a lower lift slope, which could be attributed to shape and roughness imperfections and the

---

 Number: 1 Author: RR Subject: Highlight Date: 08/04/2026 17:47:08

2D RANS simulations are not expensive. Did the authors check the pressure data against CFD results from other AoA to support this claim?

 Author: RR Subject: Sticky Note Date: 08/04/2026 17:47:08

Also, please quantify the uncertainty in the measurement data so that the reader can better assess the discrepancy with CFD.

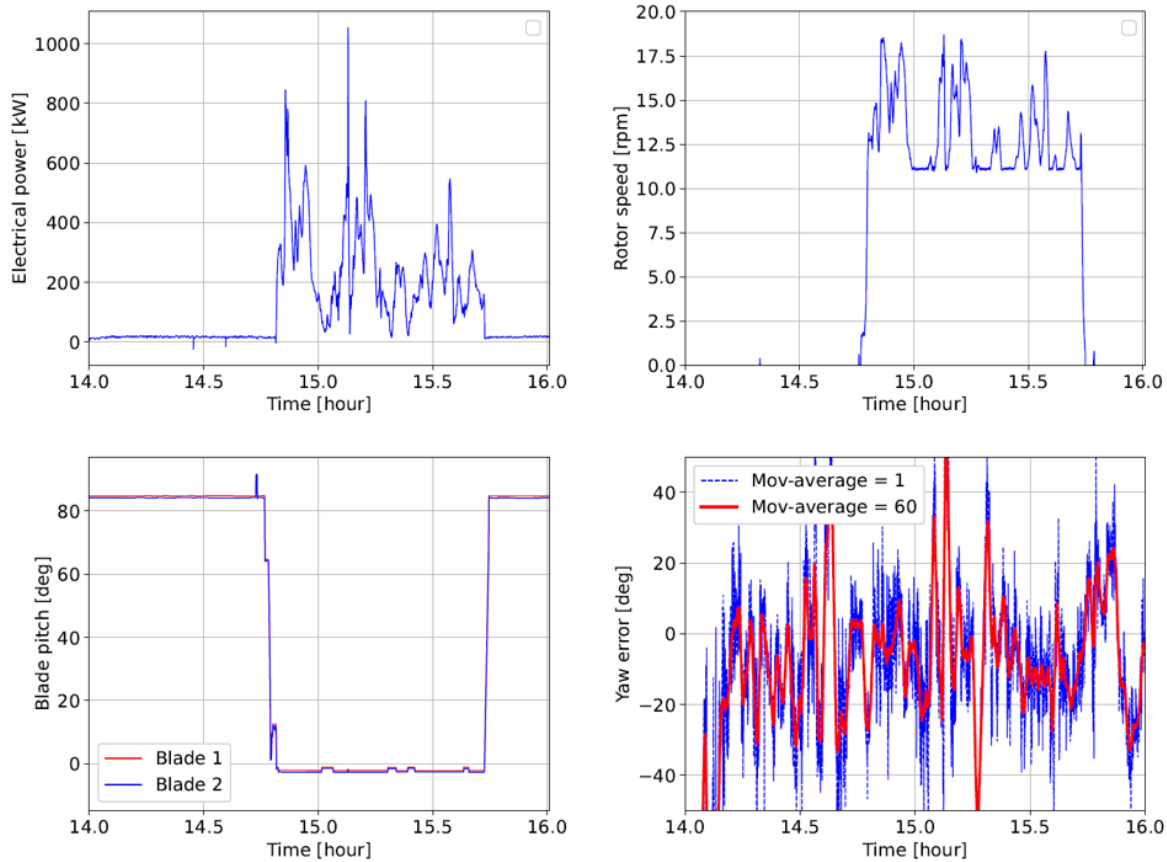

**Figure 13.** (top left) Electrical power and (bottom left) blade pitch for the D2 campaign. (top right) Rotor speed and (bottom right) yaw error with no moving average of the 1 Hz data in comparison with a 60 s average.

uncertainty mentioned in the conversion method from the input angle to the angle of attack, the former being visible in the pressure distributions. The deviations correspond to the pressure distribution differences shown in Fig. 14.

The measurements for the outboard section match quite well with the fully turbulent simulation data, which is also in line with the good correlation between the experimental and simulated pressure distributions in Fig. 14.

## 4.5 Blade/tower interaction

### 4.5.1 Previous experimental and computational results of blade/tower interaction

As mentioned in the introduction, the experimental-based insight into the blade/tower interaction flow mechanisms is sparse. However, as background for presenting the experimental results on blade/tower interaction from the present campaign, we emphasize an important older experiment: the Unsteady Aerodynamics Experiment conducted by NREL in 2000. This experiment

Should this not be part of the lit review in Section 1? Why introduce data from the literature in the results section?

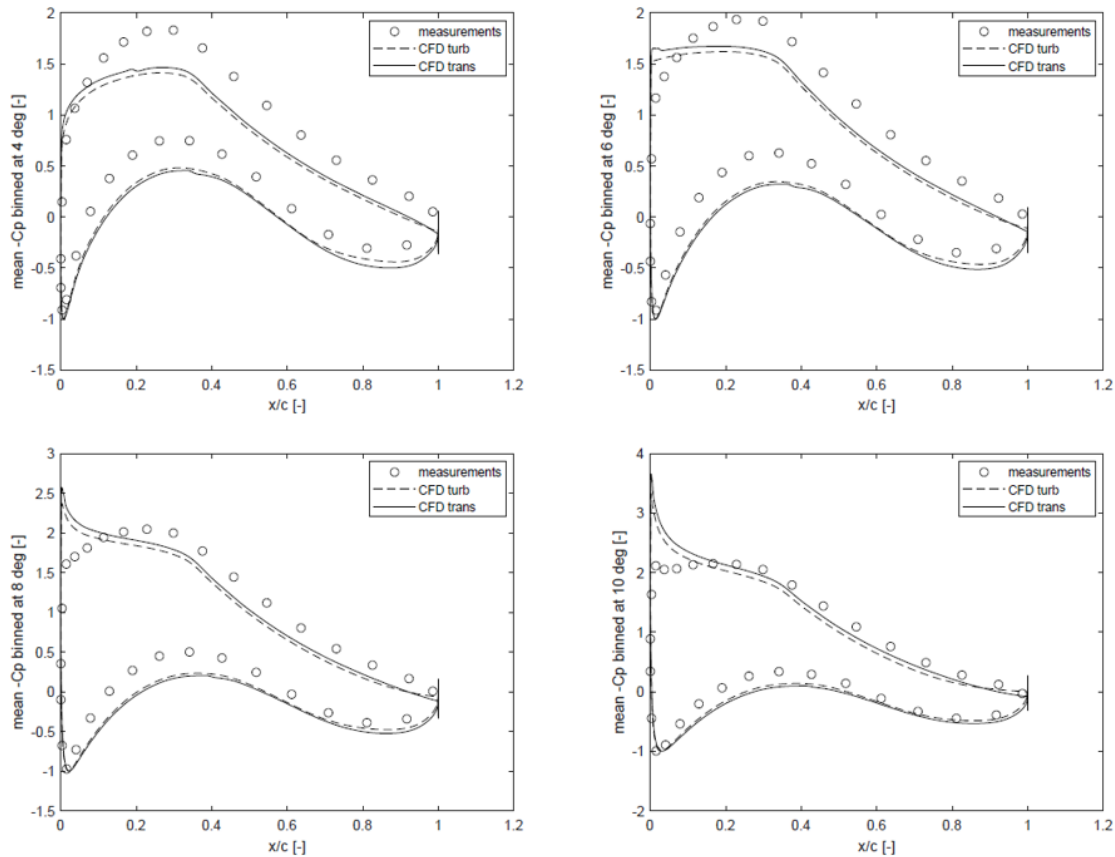

**Figure 14.** Pressure coefficients at (top left) 4, (top right) 6, (bottom left) 8, and (bottom right) 10 degrees for the inboard blade station. Experimental mean values are reported with circles, and the lines are the results from Ellipsis2D with fully turbulent (dashed) and free transition (solid) conditions.

was a test of an extensively instrumented model wind turbine rotor with 10 m diameter in the giant NASA-Ames 24.4 m by 36.6 m wind tunnel. The turbine could be operated upwind and downwind of the tubular tower.

In a later study by Zahle et al. (2009), the data were used to validate a CFD model of the blade/tower interaction on the same rotor. An important observation is that in both the simulations and in the measurements a strong impact on the blade response was caused by the blade passing through shed vortices from the tower. The blade/tower distance was 3.5 tower diameters in this prior experiment. In the present experiment, the blade/tower distance is only about 0.3 tower diameters, as it is an upwind turbine operated in a downwind configuration where, e.g., the blade prebend reduces the blade/tower clearance. Because of this much closer distance between blade and tower, it is expected that the blade in the present experiment will pass through a more clean deficit as visualized in the CFD flow field simulations at one tower diameter downstream of the tower, as presented

This page contains no comments

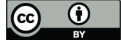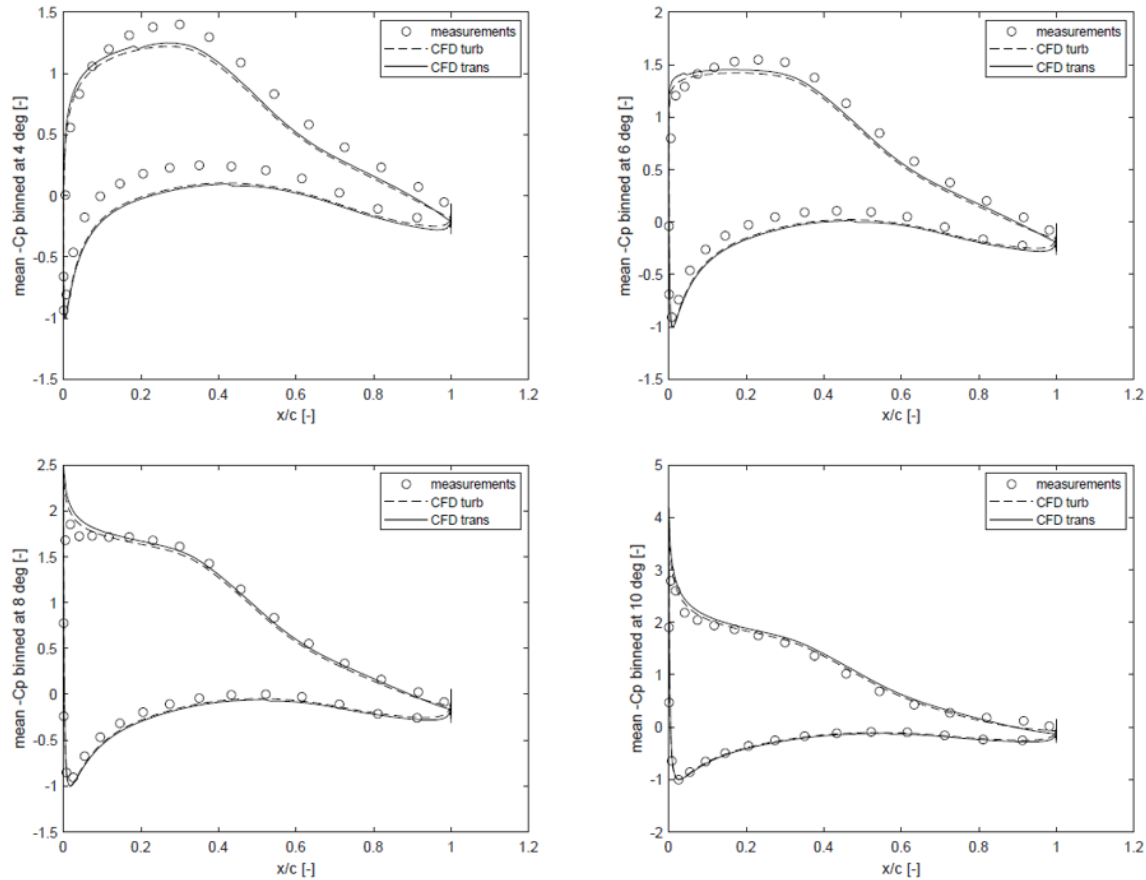

**Figure 15.** Pressure coefficients at (top left) 4, (top right) 6, (bottom left) 8, and (bottom right) 10 degrees for the outboard blade station. Experimental mean values are reported with circles, and the lines are generated by Ellipsys2D with fully turbulent (dashed) and free transition (solid) conditions.

330 in Madsen et al. (2007). It should also be mentioned that no pressure measurements were carried out on the tower in the Unsteady Aerodynamics Experiment, preventing the full validation of the simulated blade/tower interaction.

#### 4.5.2 Measured blade and tower sectional aerodynamic loads

The integrated total aerodynamic loads  $F_{tower}$  and  $F_{n,blade}$  from the measured pressure distributions on the tower and the outboard blade section for the whole second measurement campaign of about 1 hour is shown in Fig. 17. There is an overall  
335 good correlation between the variations in blade and tower loads, but the level of the tower loads is 4–6 times lower because of the difference between the free wind speed forcing the tower and the relative velocity determining the blade sectional force.

In Figs. 18 and 19, we zoom in on a time span of only 10 s to explore the details of the impulsive loading. In Fig. 18 the wind speed is relatively low, and we can see that the tower force increases from a low mean level when the blade passes and with

This page contains no comments

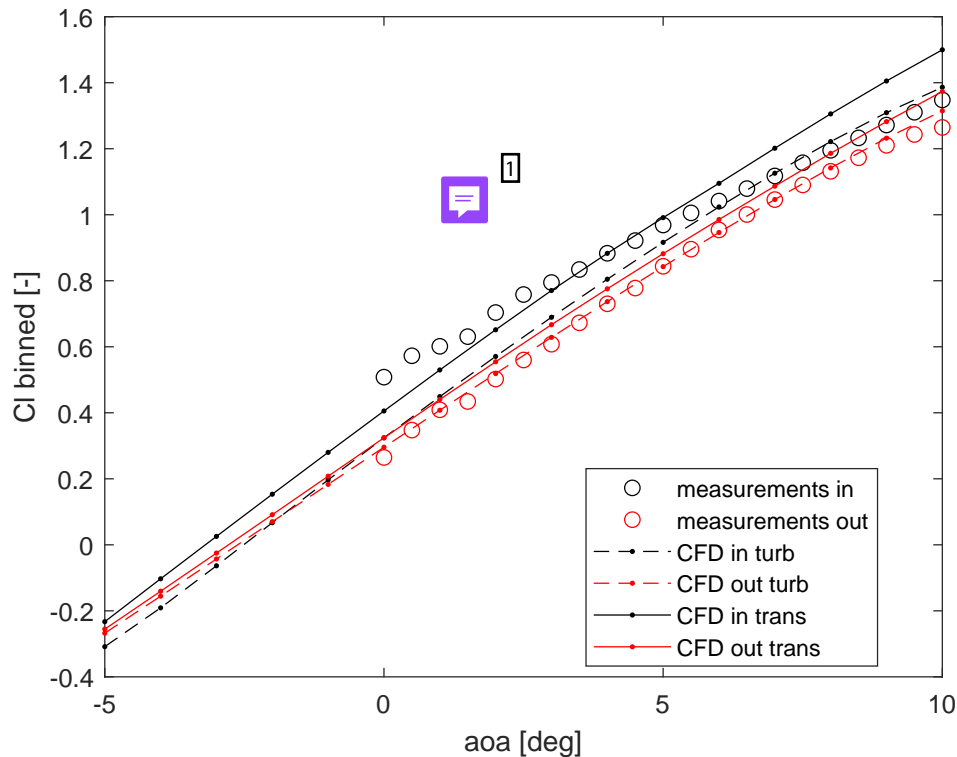

**Figure 16.** Binned lift coefficient as a function of angle of attack. Experimental mean values are reported with circles, and the lines are generated by Ellipsys2D with fully turbulent (dashed) and free transition (solid) conditions.

an impulsive force typically around  $100 \text{ N m}^{-1}$ . The impulsive force of the blade is a decrease in the load level of 200–400  $\text{N m}^{-1}$ . At a higher wind speed, as is the case in Fig. 19, the tower force decreases from the mean level with an impulsive amplitude of 100–150  $\text{N m}^{-1}$  compared to the impulsive blade force of 200–500  $\text{N m}^{-1}$ .

#### 4.5.3 Details of the pressure variation on the tower

Next, we look at the details of the pressure variation on the tower. The time traces of the measured pressure at two ports are shown in Fig. 20, together with the reconstructed pressure signals (dashed lines). Port 32 is in the compass direction of about 325 deg and thus upstream of the tower and the rotor and on the windward side of the tower (Fig. 3). The port is at the end of pressure belt 2 and has the longest tube length of about 10.7 m (length of the connection tube to the scanner  $\approx 1 \text{ m}$  plus half the circumference of the tower, 9.7 m). This gives a strong impact of the dynamic reconstruction as evidenced by comparing the solid (raw) and reconstructed (dashed blue) lines in Fig. 20). The pressure drop in the reconstructed signal is much deeper and the time delay of the raw signal is removed. On the other hand, the reconstruction is not visible for port 1 at a compass

---

 Number: 1 Author: RR Subject: Sticky Note Date: 08/04/2026 17:47:08

Do the data presented here and in figs 14 and 15 include the blade passage downstream of the tower? Would it make sense to filter them out?

---

 Number: 2 Author: RR Subject: Highlight Date: 08/04/2026 17:47:08

Please use full words in the legend (e.g. inboard instead of in ?) or explain the legend in the caption

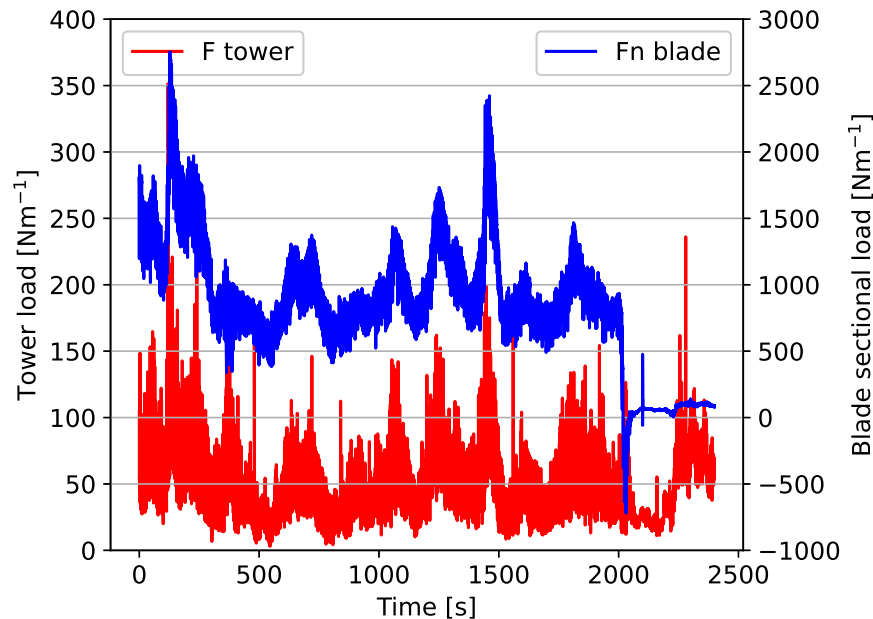

**Figure 17.** Time traces of the total aerodynamic load on the tower and the outboard normal sectional aerodynamic load during the second campaign.

350 angle of 145 degrees. Port 1 has the shortest length to the scanner, with a tube length of about 1 m, as the raw and reconstructed pressure are nearly identical except near the peaks.

The strongest variation when comparing the pressure variations at ports 1 and 32 is on the upwind tower side away from the blade passage (Fig 3). In planning the pressure tap layout, we expected that the strongest pressure variation would be on the downwind tower side closest to the blade; therefore, those taps with locations in this area should have the shortest connecting  
355 channels. However, according to tap 32's pressure response, it seems that the flow around the tower is almost blocked in the instance where the blade is behind the tower and even shows a negative pressure, whereas the pressure between the blade passage is reasonably stable around 50 Pa, caused by the free wind speed.

We present further details of tower pressure variations during a blade passage in Fig. 21, where the pressure distribution around the tower is shown at four distinct times. The different times are shown by the dots in Fig. 20 and are just before, at,  
360 just after, and in the middle of a blade passage.

Just before the passage of the blade ( $t = 3.46$  s), the pressure distribution on the downwind side of the tower at an angle of around 150 degrees is smooth and decreases to a minimum level at angles of around 65 and 265 degrees. On the upwind tower surface at an angle around 330 degrees, the distribution is slightly more irregular. We also notice that there is only a minor impact from the dynamic pressure correction.

This page contains no comments

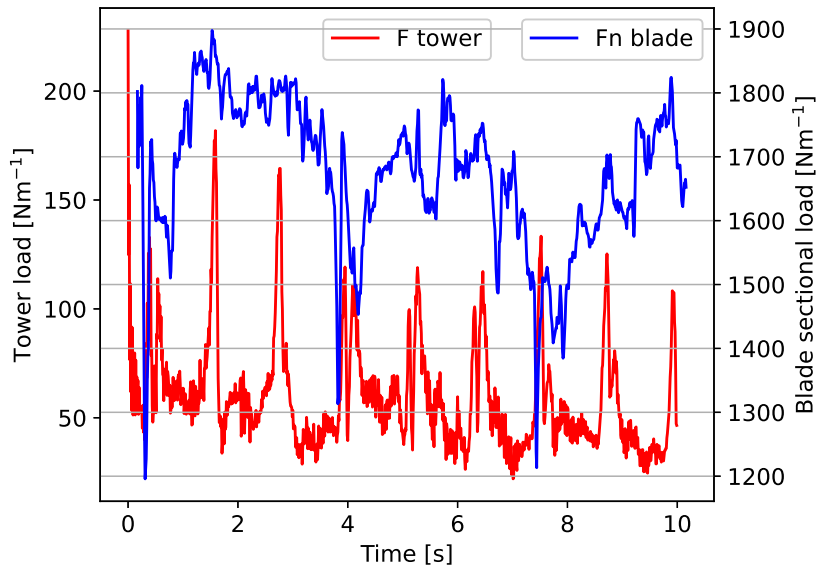

**Figure 18.** A close-up of time traces at low wind speed of the aerodynamic load on the tower and the outboard sectional aerodynamic blade load.

365 At the blade passage 0.13 s later ( $t = 3.69$  s), the pressure on the upwind tower side drops to about -50 Pa, and there is a substantial effect from the dynamic pressure correction, as seen by the different magnitudes of pressure indicated by the blue circles and red dots. On the tower side toward the blade there is a change in the pressure distribution within angles of 210–240 degrees, but there is not much impact from the dynamic pressure correction.

Just at the end of the blade passage ( $t = 3.80$  s), the pressure on the side of the tower upwind is slightly higher than before the  
370 blade passage; it then decreases to a stable level between the blade passage ( $t = 4.30$  s). However, the effect of blade passage is still being felt in the region of 60–150 degrees. It should also be noted that these considerable pressure variations are within 0.34 s and thus likely contribute to the low-frequency noise generation. This is only one snapshot of pressure variation, but animations of the pressure variations over time as found in the video link at the end of the article show that the variations are rather systematic.

#### 375 4.5.4 Details of the pressure variation on the blade

Figure 22 shows the pressure distribution on the outboard blade section at the same four distinct times as for the tower pressure distributions in Fig. 21. The main difference is between the pressure distribution at  $t = 3.69$  s in the passage of the blade and then the distributions of the blade before, just after, and in the middle of tower passage. At the blade passage, the pressure is lower on both the suction and pressure sides, and the suction peak is missing. We also notice a very small impact from

This page contains no comments

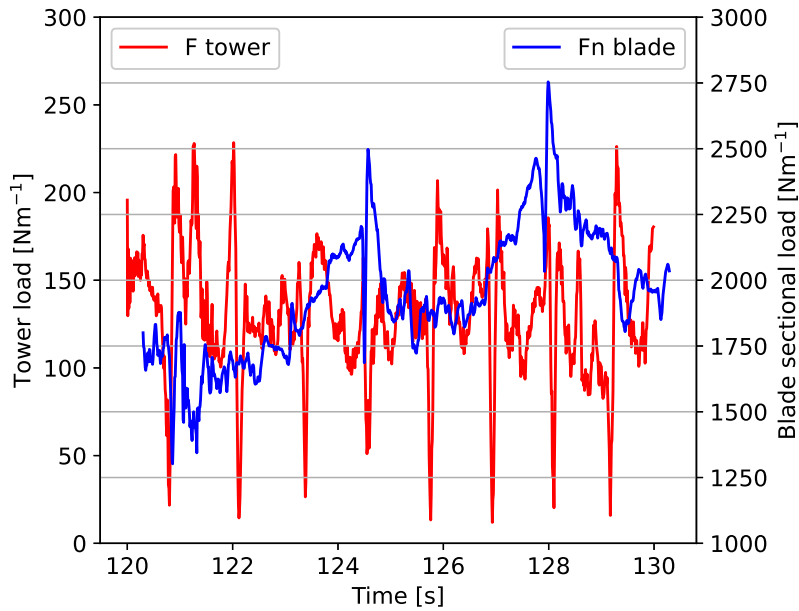

**Figure 19.** A close-up of time traces at high wind speed of the aerodynamic load on the tower and the outboard sectional aerodynamic blade load.

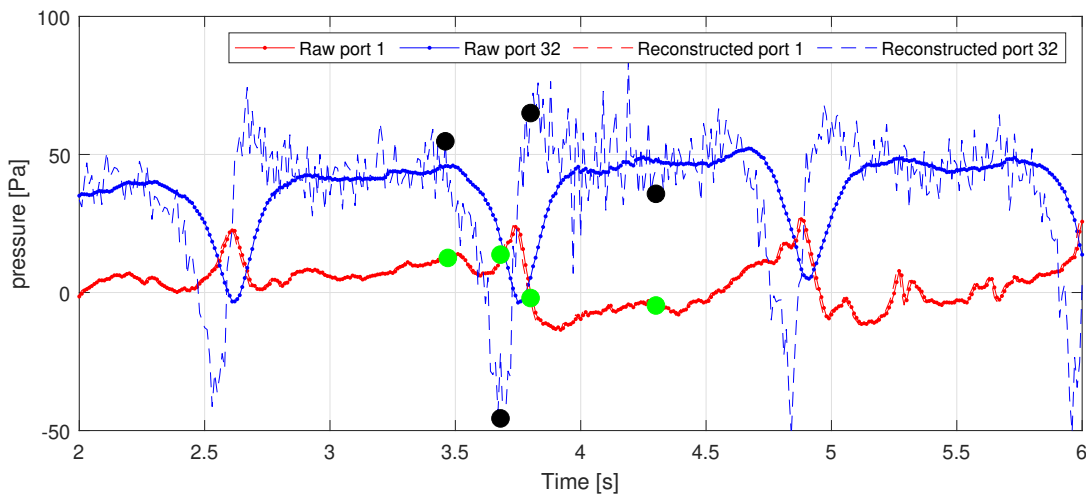

**Figure 20.** Time trace of tower pressure at two ports. The dots show the time at which polar plots of the pressure distribution are shown in Fig. 21.

380 the dynamic pressure correction, although it is a highly dynamic variation in pressure. This is due to the short channel length (around 1.5 m) of the pressure belt and the connecting tubes to the pressure scanners.

This page contains no comments

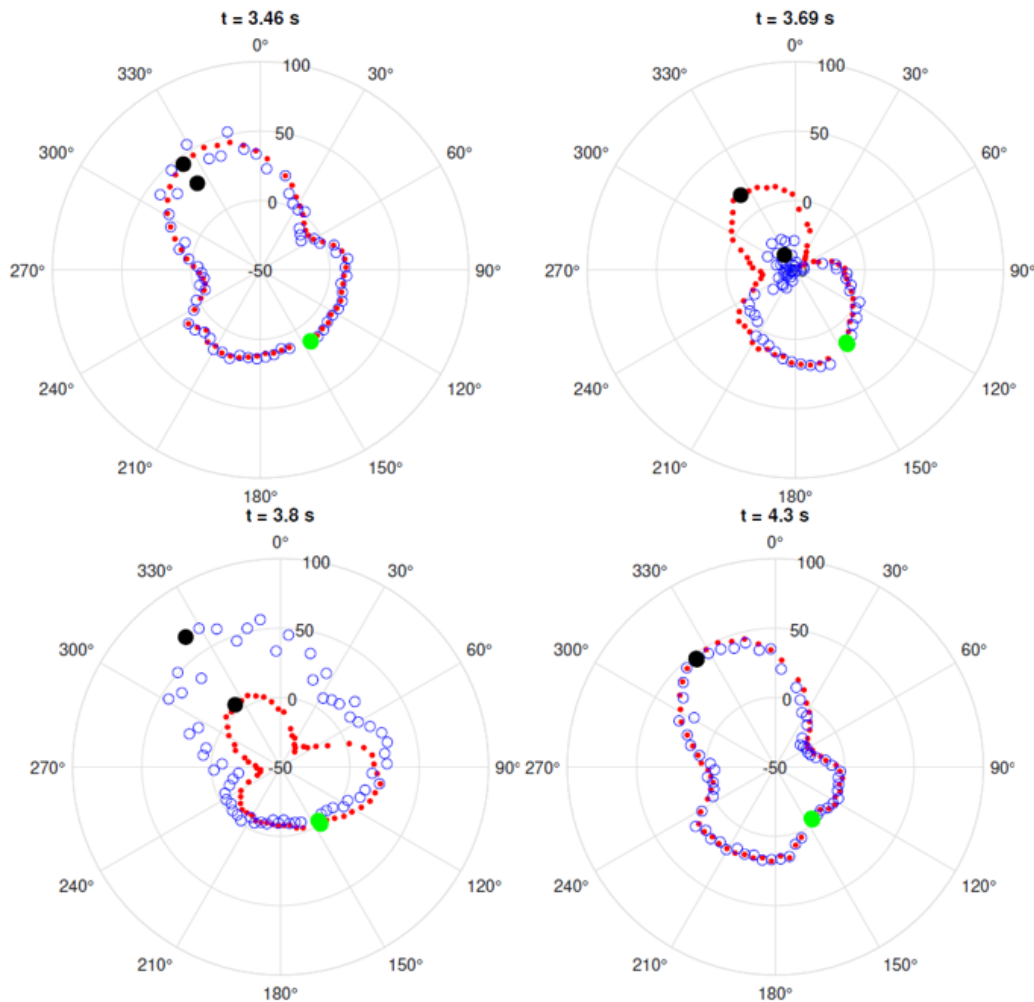

**Figure 21.** Tower pressure distributions at different times during blade passage. Red dots are raw pressure and blue circles are reconstructed pressure. The unit in the polar plot is Pa. The big green and black dots indicate port 1 at a compass angle of approximately 145 deg and port 32 at an angle of approximately 325 deg, respectively. Refer to Fig. 3 for the orientation of the belt and numbering of taps. Time traces of the pressure at these two ports are shown in Fig. 20

#### 4.5.5 Comparison of pressure measurements with aeroelastic simulations

The OpenFAST model was run to estimate the forces normal to the chord at the two blade spanwise locations where the two belts are installed. Six turbulent seeds of 10-minute simulations were run to represent conditions measured in the field in

This page contains no comments

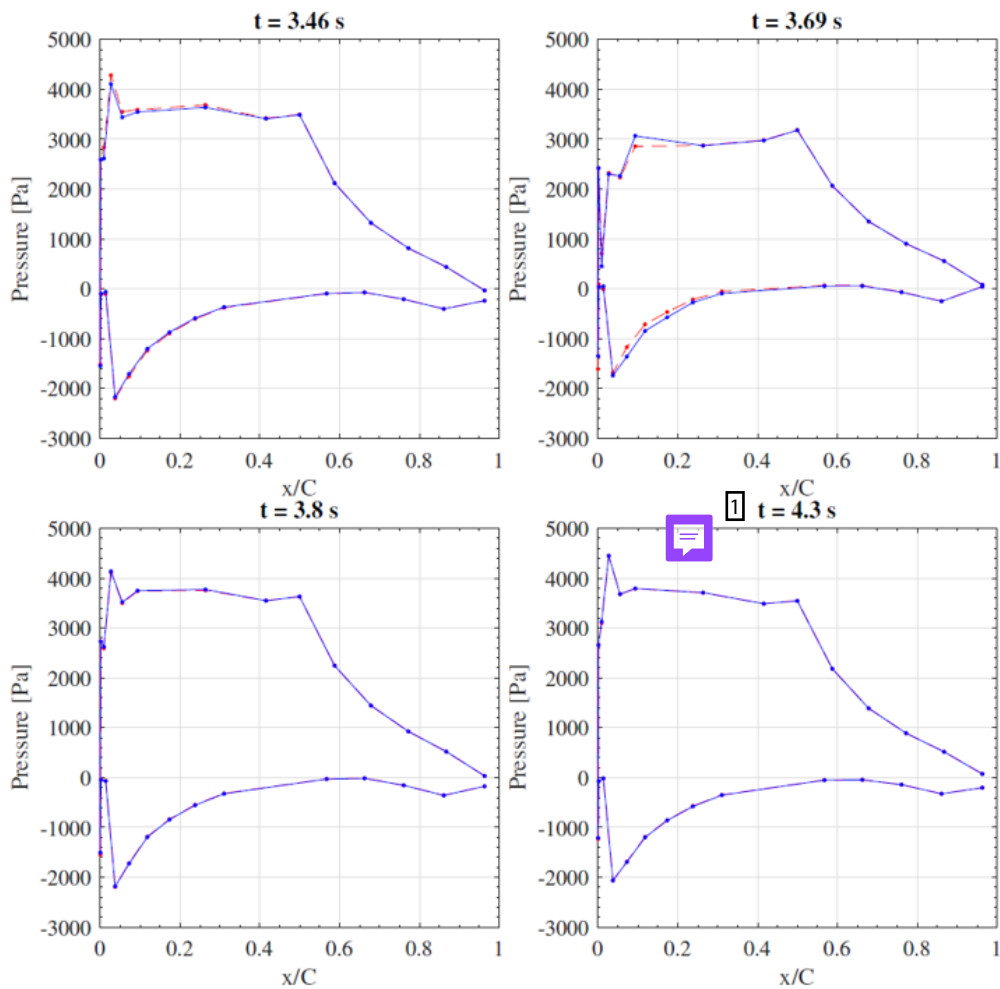

**Figure 22.** Blade surface pressure distributions, where blue is the raw measurement and red is the reconstructed measurement, at different times during blade passage;  $t = 3.46$  s (just before passage),  $t = 3.69$  s (at passage),  $t = 3.80$  s (just after passage) and  $t = 4.30$  s (in the middle of a passage).

---

Number: 1 Author: RR Subject: Sticky Note Date: 08/04/2026 17:47:08  
This figure looks pixelated, image quality could be improved.



385 terms of average wind speed, average turbulence intensity, and average shear exponent. The comparison between numerical  
predictions and experimental measurements from the first day of measurements is shown in Fig. 23. The plots display average  
values as solid lines and standard deviation as a shaded area. In addition to an offset between the two average lines, OpenFAST  
predicts deeper effects caused by the blade/tower interaction, which is estimated via the conventional Powles shadow model.  
Simulations were repeated, adopting the Eames model to predict tower shadow (Simpson et al., 2022; Eames et al., 2011) and  
390 varying the drag coefficient along the tower, with no notable improvement. Note that the above observations may be frustrated  
somewhat by effects from azimuthal binning that tend to smear the actual dynamics of the blade during individual tower  
passages (Madsen et al., 2007); this situation is evidenced by the large standard deviation of the measured data around the  
blade/tower interaction.

The observations above should also be interpreted in light of the unsteady aerodynamic effects from shed vorticity and ap-  
parent mass associated with the passage of the blade through the tower shadow, which produced effective reduced frequencies  
395 well above 0.05 and 0.2 for the outboard and inboard sections, respectively, where the effective frequency was calculated based  
on the duration of the normal-force disturbance around the blade/tower interaction event. These reduced frequencies qualify  
as moderately to highly unsteady, respectively, and it has been shown previously that attached-flow unsteady loading effects in  
these regimes cause an attenuation and delay of the maximum normal force disturbance of an airfoil section passing through the  
400 tower shadow as compared to quasi-steady aerodynamics (Leishman, 2006). Studies suggest that the validation success of indi-  
cial gust-response loading models (such as the Beddoes–Leishman-derived model employed in this article through UAMod=3)  
applied to impinging wakes is sensitive to the accuracy of the reconstruction of the incoming wake profile (Munduate et al.,  
2004; Wang and Coton, 2001; Noyes et al., 2018; Brown et al., 2021), though both tower shadow models tested produced  
similar overpredictions of the amplitude of the disturbance, granted uncertainties due to the azimuthal binning process. Look-  
405 ing ahead, leveraging the inflow time series measured by the five-hole probe during (phase-aligned) tower passages may help  
indicate whether validation error is being introduced by the modeling of the tower shadow and/or the modeling of unsteady  
blade aerodynamic effects.

## 5 Discussion

Although challenged by **cold, wet, and windy** weather conditions during the planned experimental campaign over 2 weeks in  
410 the second half of April 2024, we succeeded in conducting two campaigns, about 5 hours and 1 hour in length. On the first day  
the wind speed varied so that the turbine operated throughout its entire regime from start-up to rated power. In spite of narrow  
filters on measured power, pitch and yaw error blade pressure coefficients have been derived for four angles of attack: 4, 6, 8,  
and 10 degrees. Compared with 2D CFD simulations of the pressure coefficients in Fig. 15, we find a close correlation on the  
outboard section but some deviation at an angle of attack of 4 degrees. It seems that the measurements might be measured at a  
415 slightly higher angle of attack than 4 degrees, which was derived based on the 2D upwash correction.

At the inboard section, the deviations are more pronounced and are again greater for lower angles of attack of 4, 6, and  
8 degrees (Fig. 14). Again, this could be because of differences in the angle of attack in measured and simulated pressure

---

Number: 1 Author: RR Subject: Highlight Date: 08/04/2026 17:47:08

As much as I feel for you and congratulate you on the final outcome, this comment belongs more to an internal report than perhaps a research paper.

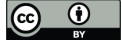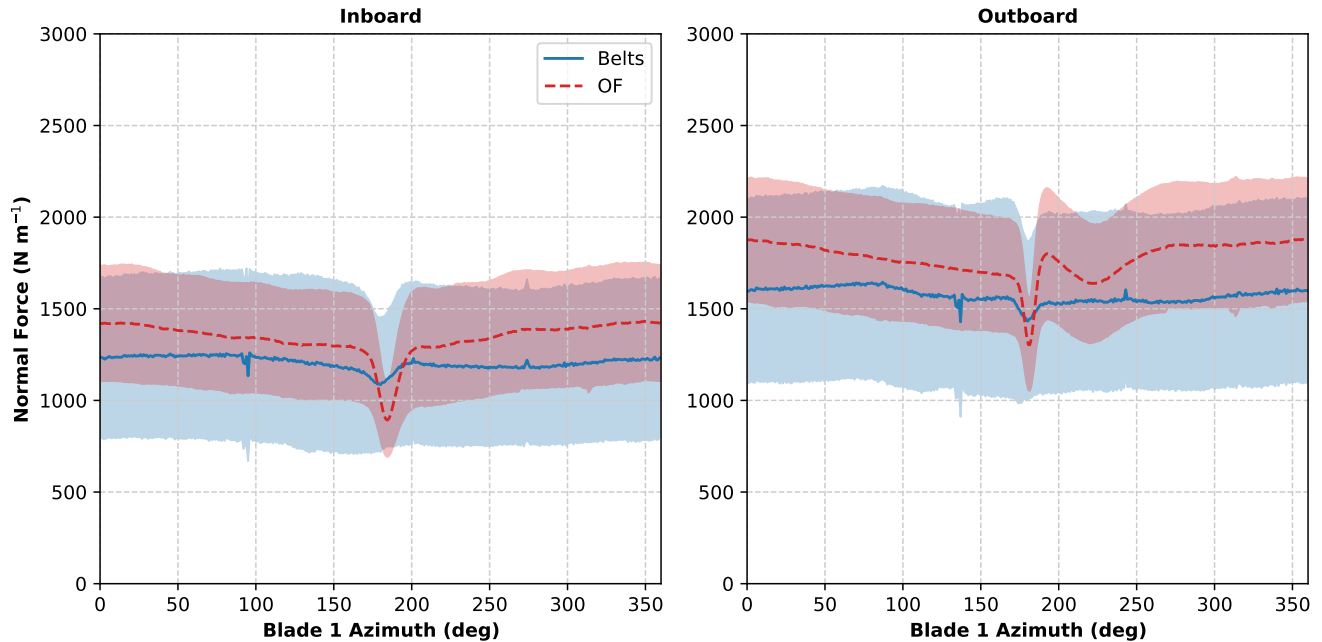

**Figure 23.** Comparison of normal forces between numerical predictions from OpenFAST and experimental measurements from the belts for (left) inboard and (right) outboard belts. The shaded area represents one standard deviation. Data are only from the first day of measurements.

distributions but also because of roughness of the blade, which might explain the missing simulated suction peak at 8 and 10 degrees.

420 However, the measured data are well suited for use in the detailed validation of high-fidelity simulation tools such as 3D  
CFD rotor simulations. The discussion of uncertainties in conversion of inflow angle to angle of attack is not as important  
because the local inflow angle at the position of the five-hole probe can be compared directly with the inflow angle extracted  
from the CFD simulations and used, for example, to tune the free wind speed in the CFD simulations. Many different validation  
cases are believed to be defined for future use of the experimental data, for example, showing the detailed pressure variation  
425 on the tower and the blade surface during the blade passage, as illustrated experimentally in Figs. 21 and 22.

Such CFD rotor simulations should then also include tower flow modeling like the simulations by Zahle et al. (2009)  
and Klein et al. (2018) and contribute to quantifying the importance of the tower as an acoustic transmitter. In the present  
measurements, we found typical impulsive forces on the tower in the range of 100–150 N m<sup>-1</sup> and impulsive blade forces in  
the range 200–500 N m<sup>-1</sup>.

This page contains no comments



## 430 6 Conclusions

We performed a detailed experimental characterization of the flow characteristics of the blade/tower interaction of a downwind rotor using a novel add-on measurement system on one blade and on the tower that consisted of pressure belts, two five-hole probes, and two data acquisition systems. The measurement campaign was part of a comprehensive project at NREL to support investigations on the feasibility, reliability, performance, and economic viability of wind turbines oriented downwind. The instrumentation at two sections on the blade was successfully installed on the 1.5 MW turbine at NREL's Flatirons Campus. In a first measurement campaign before the pressure belt on the tower was installed, pressure and inflow data at the two blade stations were measured over about 5 hours with the turbine operating from cut-in to rated wind speed. The preliminary analysis of the blade pressure distribution and inflow data indicated the data were of good quality and were thus well suited for use in validating high-fidelity simulation codes such as 3D CFD rotor models. A good demonstration of the value of the detailed pressure measurement is that the lower lift coefficient on the inboard section at a high angle of attack can be explained by the missing suction peak in the pressure distribution, maybe due to operation in atmospheric and wind tunnel flow. At the end of the campaign we succeeded in installing the pressure belt on the tower and obtained about 1 hour of pressure data on the tower and from the outboard blade section passing at the same height as the pressure belt on the tower. The initial analysis of these unique data on a full-scale downwind rotor showed impulsive loading on the tower in the range of 100–150 N m<sup>-1</sup> and on the blade section in the range of 200–500 N m<sup>-1</sup>. A dynamic correction method to compensate for the response lag in the longest channels (up to about 16 m) of the tower pressure belt showed large changes in the reconstructed data (both pressure magnitude and timing), whereas for the sampling rates used here, only minor changes were seen in the reconstructed pressure measurements on the blade sections due to the much shorter pressure belts.

*Code and data availability.* The data collected during the experiment can be shared upon reasonable request. The aeroelastic model of the turbine and the airfoil data are proprietary and cannot be shared.

*Video supplement.* <https://www.linkedin.com/in/helge-aagaard-madsen-ba006b93/recent-activity/all/>

*Author contributions.* HAM led the development of the experimental system together with AB, PH, and CBMP. The design of the belt and pressure tap layout was led by DTU in collaboration with CK and KB. Calibration of the five hole probe was carried out by AF. PH and CBMP manufactured, installed, operated, and removed the experimental system. AB prepared the data postprocessing tools and led the data analysis together with HAM. PB, HAM and CK led the setup and execution of the international collaboration. PB led the downwind experiment and supported the data analysis by running the OpenFAST model. CI, MI, JR, and ST led the field operations on the wind turbine. JN and PN led the dynamic calibration of the pressure belts. HAM was the lead author of the paper.

This page contains no comments



*Competing interests.* The authors declare that no competing interests are present.

*Acknowledgements.* This work was the result of an international collaboration between Denmark and the United States, which, in wind  
460 energy research, is as rare as it is valuable. Dozens of people at DTU, NREL, Sandia National Laboratories, and the U.S. Department  
of Energy contributed to making this collaboration possible, but special acknowledgment goes to Ben Hallissy and Paul Veers for their  
perseverance. We also extend our gratitude to NREL researchers Ryan Beach and David Barnes for the late night and early morning work  
to repair the blade after the two flyboards were removed. This work was authored in part by NREL for the U.S. Department of Energy  
(DOE) under Contract No. DE-AC36-08GO28308. Funding provided by the U.S. Department of Energy Office of Energy Efficiency and  
465 Renewable Energy Wind Energy Technologies Office. Sandia National Laboratories is a multimission laboratory managed and operated by  
National Technology & Engineering Solutions of Sandia, LLC, a wholly owned subsidiary of Honeywell International Inc., for the U.S.  
Department of Energy's National Nuclear Security Administration under contract DE-NA0003525. The views expressed in the article do  
not necessarily represent the views of the DOE or the U.S. Government. The U.S. Government retains and the publisher, by accepting the  
article for publication, acknowledges that the U.S. Government retains a nonexclusive, paid-up, irrevocable, worldwide license to publish or  
470 reproduce the published form of this work, or allow others to do so, for U.S. Government purposes.

This page contains no comments



## References

- Bergh, H. and Tijdeman, H.: Theoretical and experimental results for the dynamic response of pressure measuring systems., TR F.238, Amsterdam Nationaal Luchtvaartlaboratorium (National Aeronautical and Astronautical Research Institute), 1965.
- Bortolotti, P., Kapila, A., and Bottasso, C. L.: Comparison between upwind and downwind designs of a 10 MW wind turbine rotor, *Wind Energy Science*, 4, 115–125, <https://doi.org/10.5194/wes-4-115-2019>, 2019.
- 475 Bortolotti, P., Johnson, N., Abbas, N. J., Anderson, E., Camarena, E., and Paquette, J.: Land-based wind turbines with flexible rail-transportable blades - Part 1: Conceptual design and aeroservoelastic performance, *Wind Energy Science*, 6, 1277–1290, <https://doi.org/10.5194/wes-6-1277-2021>, 2021.
- Bortolotti, P., Fingersh, L. J., Hamilton, N., Huskey, A., Ivanov, C., Iverson, M., Keller, J., Lambert, S., Roadman, J., Slaughter, D., Thao, S., and Wells, C.: Upwind vs downwind: Loads and acoustics of a 1.5 MW wind turbine, *Wind Energy Science Discussions*, 2025, 1–39, <https://doi.org/10.5194/wes-2025-8>, 2025.
- 480 Brown, K., Molinaro, N., Meyers, T., Borgoltz, A., Devenport, W., Luedke, J., and Pesetsky, D.: Sensitivity of wind turbine airfoil sections to geometry variations inherent in modular blades, *Wind Engineering*, 42, 529–546, 2018.
- Brown, K., Fleming, J., Langford, M., Walton, W., Ng, W., Schwartz, K., Wisda, D., and Burdisso, R.: Reduced-order prediction of unsteady propeller loading and noise from pylon wake ingestion, *AIAA Journal*, 59, 3304–3316, <https://doi.org/https://doi.org/10.2514/1.J060109>, 2021.
- 485 Brown, K., Bortolotti, P., Branlard, E., Chetan, M., Dana, S., deVelder, N., Doubrawa, P., Hamilton, N., Ivanov, H., Jonkman, J., Kelley, C., and Zalkind, D.: One-to-one aeroservoelastic validation of operational loads and performance of a 2.8 MW wind turbine model in OpenFAST, *Wind Energy Science*, 9, 1791–1810, <https://doi.org/10.5194/wes-9-1791-2024>, 2024.
- 490 Damiani, R. R. and Hayman, G.: The unsteady aerodynamics module for fast8, Tech. rep., National Renewable Energy Lab.(NREL), Golden, CO (United States), 2019.
- Drela, M. and Giles, M. B.: Viscous-inviscid analysis of transonic and low Reynolds number airfoils, *AIAA Journal*, 25, 1347–1355, <https://doi.org/10.2514/3.9789>, 1987.
- Eames, I., Jonsson, C., and Johnson, P. B.: The growth of a cylinder wake in turbulent flow, *Journal of Turbulence*, 12, N39, <https://doi.org/10.1080/14685248.2011.619985>, 2011.
- 495 Fritz, E. K., Kelley, C. L., and Brown, K. A.: On optimizing the sensor spacing for pressure measurements on wind turbine airfoils, *Wind Energy Science*, 9, 1713–1726, <https://doi.org/10.5194/wes-9-1713-2024>, 2024.
- Hubbard, H. and Shepherd, K.: Aeroacoustics of large wind turbines, *Journal of the Acoustical Society of America*, 89, 2495–2508, <https://doi.org/10.1121/1.401021>, 1991.
- 500 Ildvedsen, S.: Design of a windtunnel test section for 2D aerofoils, B.s. thesis, Technical University of Denmark, 2017.
- Kelley, N. D.: Acoustic noise generation by the DOE/NASA MOD-1 wind turbine, 1981.
- Klein, L., Gude, J., Wenz, F., Lutz, T., and Krämer, E.: Advanced CFD-MBS coupling to assess low-frequency emissions from wind turbines, *Wind Energy Science Discussions*, pp. 1–30, <https://doi.org/10.5194/wes-2018-51>, 2018.
- Leishman, G. J.: Principles of helicopter aerodynamics with CD extra, pp. 757–761, Cambridge university press, 2006.
- 505 Madsen, H. A.: Low frequency noise from wind turbines mechanisms of generation and its modelling, *Journal of Low Frequency Noise, Vibration and Active Control*, 29, 239–251, <https://doi.org/10.1260/0263-0923.29.4.239>, 2010.

This page contains no comments



- Madsen, H. A., Johansen, J., Sørensen, N. N., Larsen, G. C., and Hansen, M. H.: Simulation of low frequency noise from a downwind wind turbine rotor, [technical Papers] Presented at the 42. Aiaa Aerospace Sciences Meeting and Exhibit, 11, 7549–7560, <https://doi.org/10.2514/6.2007-623>, 2007.
- 510 Madsen, H. A., Barlas, T., Fischer, A., Olsen, A., and Gomez Gonzalez, A.: Inflow and pressure measurements on a full scale turbine with a pressure belt and a five hole pitot tube, *Journal of Physics: Conference Series*, 2265, 022096, <https://doi.org/10.1088/1742-6596/2265/2/022096>, 2022.
- Madsen, H. A., Gonzalez, A. G., Barlas, T., Olsen, A. S., Brabæk Ildvedsen, S., and Fischer, A.: Blade surface pressure and drag measurement of a blade section on a 4.3 MW turbine with trailing edge flaps, *Wind Energy Science Discussions*, 2025, 1–23, 515 <https://doi.org/10.5194/wes-2025-75>, 2025.
- Mears, L. J., Nikoueeyan, P., Hind, M. D., Strike, J., Perry, M., Wimpenny, B., and Naughton, J. W.: Unsteady Surface Pressure Characterization on Launch Vehicle in Liftoff Configuration, *Journal of Spacecraft and Rockets*, 61, 1248–1257, <https://doi.org/10.2514/1.a36032>, 2024.
- Mendoza, I., Hur, J., Thao, S., and Curtis, A.: Power Performance Test Report for the U.S. Department of Energy 1.5-Megawatt Wind 520 Turbine, Tech. rep., National Renewable Energy Lab. (NREL), Golden, CO (United States), <https://doi.org/10.2172/1215120>, 2015.
- Michelsen, Jess A.: Forskning i aeroelasticitet (Research in aeroelasticity) EFP-2001, chap. 6. Beregning af laminar-turbulent omslag i 2D og 3D (Computation of laminar-turbulent transition in 2D and 3D), Risø-R-1349(DA), Forskningscenter Risø (now DTU Wind), ISBN 87-550-3078-5, 2002.
- Moriarty, P. J. and Hansen, A. C.: AeroDyn Theory Manual, Tech. rep., National Renewable Energy Lab., Golden, CO (US), 525 <https://doi.org/10.2172/15014831>, 2005.
- Munduate, X., Coton, F. N., and Galbraith, R. A. M.: An investigation of the aerodynamic response of a wind turbine blade to tower shadow, *J. Sol. Energy Eng.*, 126, 1034–1040, 2004.
- Nikoueeyan, P. and Naughton, J. W.: Evaluation of Embedded Miniature Pressure Scanners for Unsteady Measurements in a Low-Speed Wind Tunnel Testing Application, in: AIAA SCITECH 2024 Forum, American Institute of Aeronautics and Astronautics, 530 <https://doi.org/10.2514/6.2024-1123>, 2024.
- Noyes, C., Qin, C., Loth, E., and Schreck, S.: Measurements and predictions of wind turbine tower shadow and fairing effects, *Journal of Wind Engineering and Industrial Aerodynamics*, 179, 297–307, 2018.
- OpenFAST: OpenFAST v3.3.0, released on October 28th, 2022, at: <https://github.com/OpenFAST/openfast>, 2022.
- Powles, S.: The Effects of Tower Shadow on the Dynamics of a Horizontal-Axis Wind Turbine, *Wind Engineering*, 7, 26–42, <http://www.jstor.org/stable/43749009>, 1983. 535
- Santos, R. and van Dam, J.: Mechanical Loads Test Report for the U.S. Department of Energy 1.5-Megawatt Wind Turbine, <https://doi.org/10.2172/1215119>, 2015.
- Simpson, J. G., Kaminski, M., and Loth, E.: Influence of tower shadow on downwind flexible rotors: Field tests and simulations, *Wind Energy*, 25, 881–896, <https://doi.org/https://doi.org/10.1002/we.2703>, 2022.
- 540 Smith, A. and Gamberoni, N.: Transition, Pressure Gradient, and Stability Theory, Tech. Rep. Douglas Aircraft Rept. ES-26388, 1956.
- Sørensen, N.: General purpose flow solver applied to flow over hills, Ph.D. thesis, Risø National Laboratory, published 2003, 1995.
- van Ingen, J.: Suggested Semi-Empirical Method for the Calculation of the Boundary Layer Transition Region, Tech. Rep. Delft Univ. of Technology Rept. VTH-74, Dept. of Aerospace Engineering, 1956.
- Viterna, L. A.: Method for predicting impulsive noise generated by wind turbine rotors, 1982.

This page contains no comments



- 545 Wang, T. and Coton, F. N.: A high resolution tower shadow model for downwind wind turbines, *Journal of Wind Engineering and Industrial Aerodynamics*, 89, 873–892, 2001.
- Zahle, F., Sørensen, N. N., and Johansen, J.: Wind Turbine Rotor-Tower Interaction Using an Incompressible Overset Grid Method, *Wind Energy*, 12, 594–619, <https://doi.org/10.1002/we.327>, 2009.
- Zajamsek, B., Yauwenas, Y., Doolan, C. J., Hansen, K. L., Timchenko, V., Reizes, J., and Hansen, C. H.: Experimental and numerical  
550 investigation of blade–tower interaction noise, *Journal of Sound and Vibration*, 443, 362–375, <https://doi.org/10.1016/j.jsv.2018.11.048>, 2019.

This page contains no comments
